# Supplementary material for: Clinical Significance of Novel Subtypes of Acute Lymphoblastic Leukemia in the Context of Minimal Residual Disease–Directed Therapy
Source: Oxford University Press journal article supplement (doi:10.1158/2643-3230.bcd-20-0229), 2021-04-10
Supplement: 26433230bcd200229-sup-257470_2_supp_7008708_qqhnry.xlsx [file 26433230bcd200229-sup-257470_2_supp_7008708_qqhnry.xlsx]

## Sheet: Supp Table S1
Supplementary Table S1. Demographic characteristics, molecular subtype, MRD levels, treatment risk group and outcome of Total 16 patients
Sample ID	RNA-seq	RNA-seq Accession number	Immunophenotype	Molecular subtype_primary	Molecular subtype_secondary	Fusion	Final risk	Age at diagnosis	WBC	Sex	Race	CNS status	Day 8 PB MRD (%)	Day 15 BM MRD (%)	Day 46 BM MRD (%)	Initial Remission Duration (years)	Remission Status
SJBALL224	Yes	EGAS00001000447	B Cell	PAX5alt	None	NoFusion	Standard	2.46	18.6	Female	Black	CNS2	2.611	3.402	0	11.4168	hematological relapse
SJHYPER021922	No	N/A	B Cell	Hyperdiploidy> 50	None	N/A	Standard	3.37	15	Female	Black	CNS2	2.417	3.006	0	12.3641	continuous remission
SJBALL021983	No	N/A	B Cell	B other	None	N/A	Standard	4.4	27.8	Male	White	CNS1	0.409	3.117	0.017	12.5394	hematological relapse
SJHYPER021984	Yes	EGAS00001003266	B Cell	Hyperdiploidy> 50	None	NoFusion	Low	3.36	15.6	Female	White	CNS1	0.808	0.727	0	11.5619	continuous remission
SJHYPER021985	No	N/A	B Cell	Hyperdiploidy> 50	None	N/A	Low	3.02	12.9	Female	White	CNS1	0	0.109	0	11.937	continuous remission
SJMLL005	Yes	EGAS00001003266	B Cell	KMT2A-rearranged	None	KMT2A-AFF1	Standard	18.73	266.1	Female	White	CNS1	1.51	2.955	.	11.9945	continuous remission
SJHYPER021923	No	N/A	B Cell	Hyperdiploidy> 50	None	N/A	Low	2.55	8	Male	White	CNS1	0.011	0	0	11.4333	continuous remission
SJBALL021924	Yes	EGAS00001003266	B Cell	B other	None	NoFusion	High	7.62	78.9	Female	White	Traumatic with blasts	26.2	38.08	1.237	1.22382	hematological relapse
SJHYPER206	Yes	EGAS00001003266	B Cell	Hyperdiploidy> 50	None	NoFusion	Low	7.13	5.4	Female	White	CNS1	0	0	.	12.0082	continuous remission
SJTALL021902	Yes	EGAS00001005084	T Cell	HOXA	None	KMT2A-MLLT4	Standard	5.94	2.85	Female	Black	CNS1	2.226	0.053	0	8.39699	continuous remission
SJETV021986	Yes	EGAS00001003266	B Cell	ETV6-RUNX1	None	ETV6-RUNX1	Standard	4.58	6.2	Male	White	CNS1	0	0.044	0.015	11.7864	continuous remission
SJBALL021987	Yes	EGAS00001005084	B Cell	B other	None	P2RY8-CRLF2	Low	2.56	10.3	Male	White	CNS1	0	0.013	0	11.666	continuous remission
SJHYPER022044	Yes	EGAS00001003266	B Cell	Hypodiploid <44	None	NoFusion	Standard	15.99	3.6	Male	White	Traumatic with blasts	0.081	0.57	0	10.2341	continuous remission
SJBALL215	Yes	EGAS00001001923	B Cell	DUX4-rearranged	None	IGH-DUX4	Standard	5.45	64.2	Female	White	CNS2	7.9	10.411	0	11.9781	continuous remission
SJETV021988	No	N/A	B Cell	ETV6-RUNX1	None	N/A	Low	5.49	2.3	Female	White	CNS1	0	0	0	12.1287	continuous remission
SJTALL021903	Yes	EGAS00001004739	T Cell	TAL1	None	STIL-TAL1	Standard	16.71	211.3	Male	White	Traumatic with blasts	10.7	1	0	11.9316	continuous remission
SJHYPO147	Yes	EGAS00001000654	B Cell	PAX5alt	None	PAX5-NOL4L	Standard	3.72	90.6	Male	White	CNS1	0.962	10.88	0.207	11.9507	continuous remission
SJBALL021989	No	N/A	B Cell	B other	None	N/A	Standard	17.56	2.6	Male	White	CNS1	0.016	0.036	0	11.7974	continuous remission
SJETV021990	Yes	EGAS00001003266	B Cell	ETV6-RUNX1	None	ETV6-RUNX1	Low	2.05	23.2	Male	White	CNS1	0	0	0	11.5181	continuous remission
SJHYPO021991	Yes	EGAS00001003266	B Cell	PAX5alt	None	PAX5-ZCCHC7	Standard	1.16	64	Female	White	CNS2	0.045	0.19	0	11.6906	continuous remission
SJTALL021904	Yes	EGAS00001005084	T Cell	TAL1	None	NoFusion	Standard	17.6	22.8	Male	White	CNS1	0.011	0	0	11.9671	continuous remission
SJINF022	Yes	EGAS00001003266	B Cell	KMT2A-rearranged	None	KMT2A-MLLT10	High	0.71	31.1	Female	White	CNS3	0.025	1.38	0	11.937	continuous remission
SJBALL021992	Yes	EGAS00001003266	B Cell	ZNF384-rearranged	None	CLTC-ZNF384	Standard	10.31	19.3	Female	White	CNS1	12.6	60.99	0	10.0452	continuous remission
SJBALL218	Yes	EGAS00001001923	B Cell	DUX4-rearranged	None	IGH-DUX4	Low	7.48	38.3	Male	White	CNS2	.	0.362	0	11.5346	continuous remission
SJHYPER022045	Yes	EGAS00001003266	B Cell	Hyperdiploidy> 50	None	NoFusion	Standard	14.96	79.34	Female	White	CNS2	4.77	6.497	0	11.9124	2ndMALIG
SJETV021993	Yes	EGAS00001003266	B Cell	ETV6-RUNX1	None	ETV6-RUNX1	Standard	4.24	5.2	Female	White	CNS1	0.166	4.787	0.003	11.614	continuous remission
SJHYPER021994	No	N/A	B Cell	Hyperdiploidy> 50	None	N/A	Standard	7.5	1.1	Female	White	CNS1	0.041	2.236	0	11.4497	continuous remission
SJBALL021995	Yes	EGAS00001003266	B Cell	ZNF384-rearranged	None	EWSR1-ZNF384	Standard	1.65	43.6	Male	Other	CNS2	0.248	2.1	0	11.2225	continuous remission
SJHYPER021996	Yes	EGAS00001003266	B Cell	Hyperdiploidy> 50	None	NoFusion	Standard	4.1	6.4	Male	White	CNS1	0.034	2.64	0	11.5346	continuous remission
SJHYPER021925	Yes	EGAS00001003266	B Cell	Hyperdiploidy> 50	None	NoFusion	Low	5.25	13	Female	White	CNS1	1.35	0.279	0	11.9781	hematological relapse
SJETV021997	Yes	EGAS00001003266	B Cell	ETV6-RUNX1	None	ETV6-RUNX1	Low	6.09	40.4	Female	White	CNS1	0.01	0.04	.	11.5756	continuous remission
SJETV021926	Yes	EGAS00001005084	B Cell	ETV6-RUNX1	None	ETV6-RUNX1	Low	7.41	9.5	Female	White	CNS1	.	0.004	0	11.54	continuous remission
SJTALL098	No	N/A	T Cell	T other	None	N/A	High	6.08	63.4	Female	White	CNS2	.	31	0	1.26215	hematological relapse
SJTALL021906	Yes	EGAS00001005084	T Cell	HOXA	None	PICALM-MLLT10	Standard	17.87	148.1	Male	White	CNS2	16.22	.	.	8.84873	CNS
SJHYPER021998	Yes	EGAS00001005084	B Cell	Hyperdiploidy> 50	None	NoFusion	Low	2.18	50.5	Female	White	CNS2	0.034	0.015	0	11.6222	continuous remission
SJHYPER021999	Yes	EGAS00001003266	B Cell	Hyperdiploidy> 50	None	NoFusion	Standard	9.9	55.3	Male	Black	Traumatic with blasts	1.318	1.076	0	11.7098	hematological relapse
SJETV022000	No	N/A	B Cell	ETV6-RUNX1	None	N/A	Standard	10.72	1.2	Male	Black	CNS1	2.157	1.115	0	11.2799	continuous remission
SJHYPER022001	Yes	EGAS00001004739	B Cell	Hyperdiploidy> 50	None	P2RY8-CRLF2	Standard	15.28	1.9	Female	White	CNS2	6.76	1.011	0	11.6496	continuous remission
SJBALL022002	Yes	EGAS00001003266	B Cell	ZNF384-rearranged	None	CREBBP-ZNF384	Standard	2.94	59.7	Male	White	CNS1	0.481	2.739	0.003	10.82	continuous remission
SJETV021927	Yes	EGAS00001003266	B Cell	ETV6-RUNX1	None	ETV6-RUNX1	Low	2.29	72.4	Female	Black	CNS2	0	0	0	11.3292	continuous remission
SJTALL021907	Yes	EGAS00001004739	T Cell	HOXA	None	KMT2A-MLLT4	Standard	13.43	32	Male	Black	Traumatic with blasts	12.1	13	0	11.4086	continuous remission
SJHYPER021928	Yes	EGAS00001003266	B Cell	Hyperdiploidy> 50	None	NoFusion	Low	12.07	29.8	Male	Black	CNS2	1.372	0.067	0	9.92197	continuous remission
SJBALL022046	No	N/A	B Cell	B other	None	N/A	Standard	8.76	5.3	Female	Other	CNS1	0.058	13.009	0.01	11.3867	continuous remission
SJHYPER022003	Yes	EGAS00001003266	B Cell	Hyperdiploidy> 50	None	NoFusion	Standard	6.69	45.15	Female	White	CNS2	0.049	1.621	0	11.3977	continuous remission
SJHYPER021929	No	N/A	B Cell	Hyperdiploidy> 50	None	N/A	Standard	3.02	5.8	Female	White	CNS1	4.07	4.188	0	11.1321	continuous remission
SJTALL021908	Yes	EGAS00001004739	T Cell	TLX1	None	TCRA-TLX1	Standard	6.92	13.9	Male	White	CNS1	0.164	0.04	0	11.1951	continuous remission
SJE2A062	Yes	EGAS00001003266	B Cell	TCF3-PBX1	None	TCF3-PBX1	Standard	1.77	37.2	Male	White	CNS1	0.675	1.053	0.005	11.5455	continuous remission
SJBALL022047	Yes	EGAS00001005084	B Cell	B other	None	NoFusion	Low	1.18	36.7	Female	White	CNS1	0	0	0	11.4771	continuous remission
SJETV022004	Yes	EGAS00001003266	B Cell	ETV6-RUNX1	None	ETV6-RUNX1	Low	11.98	2	Female	White	CNS1	0	0.003	0	10.8994	continuous remission
SJE2A063	Yes	EGAS00001003266	B Cell	TCF3-PBX1	None	TCF3-PBX1	Standard	3.29	269	Male	Black	Traumatic with blasts	0.138	1.186	0	10.7707	continuous remission
SJBALL021930	No	N/A	B Cell	B other	None	N/A	Standard	14.27	3	Male	White	CNS1	.	0.49	0.015	11.5017	continuous remission
SJTALL021909	Yes	EGAS00001005084	T Cell	T other	None	NoFusion	Standard	15.29	21.9	Male	Black	CNS1	55	5.6	0	11.3183	continuous remission
SJMLL006	Yes	EGAS00001003266	B Cell	KMT2A-rearranged	None	KMT2A-AFF1	High	11.95	407	Male	White	Traumatic with blasts	0.88	12.737	0.122	1.67556	hematological relapse
SJETV022005	No	N/A	B Cell	ETV6-RUNX1	None	N/A	Low	2.93	17.9	Female	White	CNS1	0	0	0	11.332	continuous remission
SJBALL021931	No	N/A	B Cell	B other	None	N/A	Low	2.65	7.8	Female	Black	CNS1	0.112	0.092	0	11.0828	continuous remission
SJBALL021932	No	N/A	B Cell	B other	None	N/A	Standard	16.07	3	Male	White	CNS1	.	0.153	0	0.55852	death in remission
SJE2A064	No	N/A	B Cell	TCF3-PBX1	None	N/A	High	14.98	3.77	Female	White	CNS1	0.07	1.723	0.718	2.41478	death in remission
SJHYPO022048	No	N/A	B Cell	B other	None	N/A	Standard	8.99	5.6	Male	White	CNS1	.	0.091	0	11.0582	continuous remission
SJHYPER021933	Yes	EGAS00001004739	B Cell	Hyperdiploidy> 50	None	NoFusion	Standard	16.02	4.9	Male	White	CNS1	25.816	8.818	0.008	11.3648	continuous remission
SJETV022006	No	N/A	B Cell	ETV6-RUNX1	None	N/A	Low	6.57	2	Male	Other	CNS1	0	.	0	11.2252	continuous remission
SJHYPER021934	Yes	EGAS00001003266	B Cell	Hyperdiploidy> 50	None	NoFusion	Low	2.87	7	Female	White	CNS2	0.829	0.02	0	11.2854	continuous remission
SJTALL021910	Yes	EGAS00001005084	T Cell	TLX1	None	NoFusion	Standard	11.98	13.6	Male	White	CNS1	0.1	0	0	9.62902	continuous remission
SJHYPER021935	Yes	EGAS00001003266	B Cell	Hyperdiploidy> 50	None	NoFusion	Standard	5.42	2.1	Female	White	CNS1	.	5.659	0	10.6201	continuous remission
SJPHALL026	Yes	EGAS00001000447	B Cell	BCR-ABL1	Hyperdiploid	BCR-ABL1	High	15.89	199.8	Female	Black	CNS2	0	0.008	0	11.2279	continuous remission
SJETV022007	No	N/A	B Cell	ETV6-RUNX1	None	N/A	Low	3.02	10.1	Male	Other	Traumatic with blasts	0	0.137	0	11.2799	continuous remission
SJBALL227	Yes	EGAS00001001923	B Cell	DUX4-rearranged	None	IGH-DUX4	Standard	14.5	29.7	Male	White	CNS2	0.035	0.034	0	9.86995	continuous remission
SJHYPER022008	Yes	EGAS00001003266	B Cell	Hyperdiploidy> 50	None	NoFusion	Low	3.1	16.7	Female	White	CNS1	0.01	0.155	0	10.768	continuous remission
SJETV021936	No	N/A	B Cell	ETV6-RUNX1	None	N/A	Low	4.59	6.9	Male	White	CNS1	0	0.004	0	11.0281	continuous remission
SJHYPER022009	No	N/A	B Cell	Hyperdiploidy> 50	None	N/A	Low	2.47	5.9	Male	Other	CNS1	0.011	0	0	10.6776	continuous remission
SJETV022010	Yes	EGAS00001003266	B Cell	ETV6-RUNX1	None	ETV6-RUNX1	Low	8.85	12.5	Male	White	CNS1	0.073	0.098	0	10.5845	continuous remission
SJTALL021911	Yes	EGAS00001005084	T Cell	TLX1	None	NoFusion	Standard	4.36	185	Female	White	Traumatic with blasts	4.2	0.075	0	10.5763	continuous remission
SJETV021937	Yes	EGAS00001003266	B Cell	ETV6-RUNX1	None	ETV6-RUNX1	Low	3.83	30.9	Male	White	CNS2	0	0.126	0	10.0616	continuous remission
SJBALL022011	No	N/A	B Cell	B other	None	N/A	Low	6.92	3.5	Male	White	CNS2	0	0.005	0	11.0116	continuous remission
SJTALL021912	Yes	EGAS00001005084	T Cell	HOXA	None	NoFusion	High	7.53	73.1	Male	Other	Traumatic with blasts	83	68	1.4	10.7132	continuous remission
SJETV022012	Yes	EGAS00001004739	B Cell	ETV6-RUNX1	None	NoFusion	Standard	2.02	2.6	Female	White	CNS1	0	2.286	0.096	10.9596	continuous remission
SJBALL021938	No	N/A	B Cell	B other	None	N/A	Low	2.85	23.3	Female	White	Traumatic with blasts	0.055	0.023	0	11.1075	continuous remission
SJHYPER022013	Yes	EGAS00001003266	B Cell	Hyperdiploidy> 50	None	NoFusion	Low	5.29	0.2	Male	White	CNS2	0	0.006	0	11.0089	continuous remission
SJBALL230	Yes	EGAS00001001923	B Cell	DUX4-rearranged	None	IGH-DUX4	Standard	8.82	5.9	Female	White	CNS3	0.027	0.383	0	10.7789	continuous remission
SJTALL021913	Yes	EGAS00001005084	T Cell	T other	None	NoFusion	Standard	5.54	245	Male	Black	CNS1	0.316	0.019	0	10.6721	continuous remission
SJTALL021914	Yes	EGAS00001005084	T Cell	TAL1	None	NoFusion	Standard	11.18	652	Female	White	CNS3	23.2	0.164	0	10.486	continuous remission
SJTALL021915	Yes	EGAS00001004739	T Cell	T other	None	NoFusion	Standard	12.04	5	Male	White	CNS2	0.633	0.283	0	10.9624	continuous remission
SJBALL231	Yes	EGAS00001000654	B Cell	BCR-ABL1-like	None	PAX5-ESRRA;P2RY8-CRLF2	Standard	11.25	20.8	Male	Other	CNS1	2.182	0.007	0	11.1157	continuous remission
SJBALL021921	No	N/A	B Cell	ETV6-RUNX1	None	N/A	Low	4.46	5.54	Female	White	CNS2	0	0	0	10.601	2ndMALIG
SJETV021939	Yes	EGAS00001003266	B Cell	ETV6-RUNX1	None	ETV6-RUNX1	Low	2.91	9.9	Male	White	CNS1	0	0.014	0	10.3299	continuous remission
SJETV022014	Yes	EGAS00001004739	B Cell	ETV6-RUNX1	None	ETV6-RUNX1	Low	10.37	5.3	Female	White	CNS1	0	0.003	0	10.8172	continuous remission
SJMLL021940	No	N/A	B Cell	KMT2A-rearranged	None	N/A	Standard	5.03	24	Female	Other	CNS2	0.077	0.02	0	10.9925	continuous remission
SJBALL021941	Yes	EGAS00001003266	B Cell	PAX5alt	None	PAX5-CBFA2T3	Low	7.88	8.4	Male	White	CNS1	0.029	0.008	0	10.924	continuous remission
SJETV021942	Yes	EGAS00001003266	B Cell	ETV6-RUNX1	None	ETV6-RUNX1	Low	4.06	24.3	Female	White	CNS1	0.03	0.555	0.004	10.4367	continuous remission
SJETV021943	No	N/A	B Cell	ETV6-RUNX1	None	N/A	Low	3.79	5.5	Male	Other	CNS1	0.012	0.399	0	10.8939	continuous remission
SJETV022015	Yes	EGAS00001003266	B Cell	ETV6-RUNX1	None	ETV6-RUNX1	Low	3.91	15.4	Male	White	CNS1	0	0	0	10.7077	continuous remission
SJBALL021944	Yes	EGAS00001003266	B Cell	PAX5alt	None	PAX5-ZNF521	Standard	1.97	131.7	Female	White	CNS1	6.336	2.256	0.028	10.2806	continuous remission
SJETV021945	Yes	EGAS00001003266	B Cell	ETV6-RUNX1	None	ETV6-RUNX1	Low	4.42	4.3	Male	White	CNS1	0.422	0.153	0	10.5161	continuous remission
SJHYPER022016	Yes	EGAS00001003266	B Cell	Hyperdiploidy> 50	None	NoFusion	Low	3.22	7	Male	White	CNS2	0	0.303	0	10.5599	continuous remission
SJTALL021916	Yes	EGAS00001005084	T Cell	TAL1	None	NoFusion	Standard	18.56	59.1	Male	White	CNS1	6	1.7	0	9.71663	continuous remission
SJTALL011	Yes	EGAS00001005084	ETP (Early T-cell Precursor)	T other	None	NoFusion	High	8.49	345.6	Female	White	CNS1	9.2	0.83	0.011	10.3135	continuous remission
SJE2A065	Yes	EGAS00001003266	B Cell	TCF3-PBX1	None	TCF3-PBX1	Standard	13.74	13.05	Male	Black	CNS1	0.1	0.017	0	8.17522	continuous remission
SJINF074	Yes	EGAS00001003266	B Cell	NUTM1-rearranged	None	ACIN1-NUTM1	Standard	0.82	61.8	Male	Other	CNS1	0	0	0	4.27379	continuous remission
SJHYPER022017	Yes	EGAS00001003266	B Cell	Hyperdiploidy> 50	None	NoFusion	Low	4.17	33.6	Male	White	CNS1	0.017	0	0	10.0643	continuous remission
SJHYPER021946	Yes	EGAS00001003266	B Cell	Hyperdiploidy> 50	None	NoFusion	Low	5.28	4.3	Male	White	CNS1	0.433	0.009	0	10.82	continuous remission
SJETV022018	Yes	EGAS00001004739	B Cell	ETV6-RUNX1	None	ETV6-RUNX1	Low	3.55	6.1	Female	White	CNS1	0.01	0.028	0	10.4175	continuous remission
SJETV022019	Yes	EGAS00001003266	B Cell	ETV6-RUNX1	None	ETV6-RUNX1	Low	3.43	6.7	Male	White	CNS1	0	0	0	9.71389	continuous remission
SJHYPER227	Yes	EGAS00001003266	B Cell	Hyperdiploidy> 50	None	NoFusion	Low	2.33	7	Male	Black	CNS1	0	0	0	9.9384	continuous remission
SJBALL022020	Yes	EGAS00001003266	B Cell	PAX5alt	None	PAX5-AUTS2	Low	2.67	38.7	Female	Other	CNS2	0.454	0.436	0	9.94114	continuous remission
SJETV022049	Yes	EGAS00001003266	B Cell	ETV6-RUNX1	None	ETV6-RUNX1	Low	5.16	11.1	Female	Black	CNS1	0	0	0	10.4723	continuous remission
SJBALL021947	Yes	EGAS00001003266	B Cell	PAX5alt	None	NoFusion	Standard	7.34	97.57	Male	White	CNS1	4.22	3.44	0	10.538	continuous remission
SJETV021948	Yes	EGAS00001003266	B Cell	ETV6-RUNX1	None	ETV6-RUNX1	Standard	3.09	2.9	Male	White	CNS1	0	1.8	0	10.5654	continuous remission
SJETV022021	No	N/A	B Cell	ETV6-RUNX1	None	N/A	Low	3.7	9.2	Male	White	CNS1	0	0	0	9.32786	continuous remission
SJETV022022	Yes	EGAS00001004739	B Cell	ETV6-RUNX1	None	ETV6-RUNX1	Low	16.72	2.8	Female	White	CNS1	0	0	0	10.2313	continuous remission
SJMLL007	Yes	EGAS00001005084	B Cell	KMT2A-rearranged	None	NoFusion	Standard	10.07	3.2	Female	White	CNS1	0	0.039	.	10.4668	hematological relapse
SJTALL021917	Yes	EGAS00001005084	T Cell	TAL1	None	NoFusion	Standard	7.79	173.2	Female	White	CNS1	16.2	4.75	0	10.3819	continuous remission
SJTALL021918	Yes	EGAS00001005084	T Cell	TAL1	None	NoFusion	Standard	5.43	341	Male	White	CNS3	17	2.3	0	10.6393	continuous remission
SJPHALL027	Yes	EGAS00001003266	B Cell	BCR-ABL1	None	BCR-ABL1	High	7.72	10.6	Male	White	CNS1	0	1.522	0	9.63997	continuous remission
SJETV021949	Yes	EGAS00001003266	B Cell	ETV6-RUNX1	None	ETV6-RUNX1	Standard	9.9	35.7	Female	White	CNS1	0.22	0.107	0.197	10.0507	continuous remission
SJBALL021901	Yes	EGAS00001002217	B Cell	iAMP21	None	NoFusion	Standard	8.26	28.1	Male	White	CNS1	0.866	1.935	0	10.0068	continuous remission
SJTALL012	Yes	EGAS00001005084	ETP (Early T-cell Precursor)	HOXA	None	RUNX1-HOTTIP;RUNX1-EVX1	High	15.76	8.3	Female	White	CNS1	60.54	18.66	0.012	10.0835	continuous remission
SJTALL021919	Yes	EGAS00001005084	T Cell	TAL1	None	NoFusion	Standard	5.03	361.9	Male	White	CNS1	16.7	0.408	0	9.95756	continuous remission
SJETV022023	Yes	EGAS00001003266	B Cell	ETV6-RUNX1	None	ETV6-RUNX1	Low	3.12	31.7	Male	White	CNS1	0.01	0.288	0	10.2012	continuous remission
SJHYPER021950	Yes	EGAS00001003266	B Cell	Hyperdiploidy> 50	None	NoFusion	Standard	4.28	284.55	Male	White	CNS2	3.35	16.35	0.174	10.2943	HEM+T
SJHYPER021951	Yes	EGAS00001005084	B Cell	Hyperdiploidy> 50	None	NoFusion	Standard	2.03	64.68	Female	White	CNS2	1.946	0.251	0	9.45927	continuous remission
SJETV021952	Yes	EGAS00001003266	B Cell	ETV6-RUNX1	None	ETV6-RUNX1	Low	5.14	23.6	Male	White	CNS2	0.026	0.01	0	10.2149	continuous remission
SJETV021953	Yes	EGAS00001003266	B Cell	ETV6-RUNX1	None	ETV6-RUNX1	Standard	2.53	33	Female	White	CNS1	0	0.01	0.03	9.68652	continuous remission
SJHYPER021954	Yes	EGAS00001003266	B Cell	Hyperdiploidy> 50	None	NoFusion	Low	4.31	3.1	Male	White	CNS1	0.243	0.296	0	10.2998	continuous remission
SJTALL021920	Yes	EGAS00001005084	T Cell	TAL1	None	NoFusion	Standard	8.39	54.9	Male	White	CNS1	9.378	0.494	0	10.1574	continuous remission
SJBALL021955	Yes	EGAS00001003266	B Cell	PAX5alt	None	NoFusion	Standard	15.6	49.1	Male	Black	CNS2	0.01	.	0	7.96988	continuous remission
SJETV021956	Yes	EGAS00001003266	B Cell	ETV6-RUNX1	None	ETV6-RUNX1	Low	3.78	42.2	Female	Black	CNS1	0.254	0.588	0	9.76591	continuous remission
SJBALL239	Yes	EGAS00001000654	B Cell	BCR-ABL1-like	None	NoFusion	Standard	13.37	1.8	Male	White	CNS2	0.027	0	0	9.98494	continuous remission
SJBALL000010	Yes	EGAS00001000654	B Cell	BCR-ABL1-like	None	RANBP2-ABL1	High	15.47	130	Male	Other	CNS1	28.2	81	1.286	6.84463	2ndMALIG
SJHYPER021957	Yes	EGAS00001003266	B Cell	Hyperdiploidy> 50	None	NoFusion	Standard	8.96	1.3	Female	White	CNS1	0.4	1.225	0	9.78234	continuous remission
SJBALL021958	Yes	EGAS00001005084	B Cell	B other	None	PAX5-PML	Low	1.67	14.8	Male	White	CNS2	0	0.443	0	10.2122	continuous remission
SJMLL008	Yes	EGAS00001005084	T Cell	HOXA	None	KMT2A-MLLT4	Standard	7.68	27.5	Female	White	CNS1	31.6	20.86	0	10.1437	continuous remission
SJBALL241	Yes	EGAS00001004739	B Cell	DUX4-rearranged	None	High DUX4 expression	Low	3.65	5.4	Female	White	CNS1	0.42	0.607	0	10.0507	continuous remission
SJTALL022054	Yes	EGAS00001004739	T Cell	T other	None	TFG-GPR128	Standard	5.61	17.3	Female	White	CNS1	5.1	0.06	0	10.204	continuous remission
SJETV021959	Yes	EGAS00001003266	B Cell	ETV6-RUNX1	None	ETV6-RUNX1	Low	2.93	18.6	Female	White	CNS1	0	0.012	0	9.68104	continuous remission
SJTALL022055	Yes	EGAS00001005084	T Cell	TAL1	None	NoFusion	Standard	11.94	474	Male	Black	CNS3	0.96	0.19	0	1.00479	hematological relapse
SJBALL021960	Yes	EGAS00001003266	B Cell	ETV6-RUNX1-like	None	NoFusion	Low	1.89	14.1	Male	White	CNS1	0.02	0.012	0	5.62355	2ndMALIG
SJHYPO022024	Yes	EGAS00001003266	B Cell	PAX5alt	None	PAX5-ZNF521	Standard	1.82	11.2	Female	Other	CNS1	0.012	4.287	0	10.2122	continuous remission
SJHYPER022025	No	N/A	B Cell	Hyperdiploidy> 50	None	N/A	Low	4.63	2	Male	White	CNS1	0	.	0	9.90554	continuous remission
SJETV022026	Yes	EGAS00001003266	B Cell	ETV6-RUNX1	None	ETV6-RUNX1	Low	4.34	31.84	Female	White	CNS1	0.05	0.011	.	0.06297	death in induction
SJE2A066	Yes	EGAS00001003266	B Cell	TCF3-PBX1	None	TCF3-PBX1	Standard	4.4	32.7	Male	White	CNS1	0.033	0.221	0	9.62081	continuous remission
SJHYPER021961	Yes	EGAS00001003266	B Cell	Hyperdiploidy> 50	None	NoFusion	Standard	7.64	6.1	Male	White	CNS1	3.622	1.155	0	10.0424	continuous remission
SJHYPER022027	Yes	EGAS00001003266	B Cell	Hyperdiploidy> 50	None	NoFusion	Standard	3.23	28.1	Female	Black	CNS1	0.645	4.19	0	9.62628	continuous remission
SJMLL022028	Yes	EGAS00001004739	B Cell	KMT2A-rearranged	None	KMT2A-MLLT1	Standard	1.26	7.8	Female	White	CNS2	0	0	0	9.69473	continuous remission
SJBALL243	Yes	EGAS00001003266	B Cell	DUX4-rearranged	None	IGH-DUX4	Standard	12.88	20.7	Female	White	CNS1	4.4	53.27	0	9.82341	continuous remission
SJBALL022050	No	N/A	B Cell	BCR-ABL1-like	None	N/A	Standard	13.47	6.6	Male	White	CNS1	0.066	0.313	0	9.66461	continuous remission
SJTALL022056	Yes	EGAS00001005084	T Cell	T other	None	RUNX1-AFF3;NUP214-ABL1	Standard	10.79	10	Female	White	CNS1	12.4	7.4	0.154	9.61807	continuous remission
SJBALL022029	Yes	EGAS00001004739	B Cell	B other	None	P2RY8-CRLF2	Standard	2.59	135	Female	White	CNS2	0.018	0.008	0	9.63176	continuous remission
SJBALL022051	Yes	EGAS00001003266	B Cell	B other	None	NoFusion	High	12.24	4.5	Male	White	CNS2	1.581	34.43	0.122	9.79329	continuous remission
SJHYPER022030	No	N/A	B Cell	Hyperdiploidy> 50	None	N/A	Standard	9.45	4.9	Male	Black	CNS1	0	1.262	0	9.80972	continuous remission
SJMLL022031	Yes	EGAS00001003266	B Cell	KMT2A-rearranged	None	KMT2A-MLLT1	Standard	1.33	20.8	Male	Other	CNS2	1.973	0.015	0	2.25873	hematological relapse
SJTALL022057	Yes	EGAS00001004739	T Cell	T other	None	NoFusion	High	9.73	3.64	Female	Black	CNS2	35	68.66	1.77	9.23751	continuous remission
SJMLL009	Yes	EGAS00001003266	B Cell	KMT2A-rearranged	None	KMT2A-AFF1	Standard	18.33	15.4	Male	Black	CNS1	0.021	0	0	8.89528	continuous remission
SJINF075	Yes	EGAS00001003266	B Cell	KMT2A-rearranged	None	KMT2A-AFF1	High	0.16	54.4	Female	White	Traumatic with blasts	0	0	0	0.97194	death in remission
SJHYPER022032	Yes	EGAS00001003266	B Cell	Hyperdiploidy> 50	None	NoFusion	Standard	2.45	15	Male	White	CNS2	0.244	0.33	0	9.27584	continuous remission
SJBALL247	Yes	EGAS00001000654	B Cell	ETV6-RUNX1-like	None	ETV6-CD163;YWHAG-IKZF1	Standard	1.64	7.45	Male	White	CNS1	0.035	2.023	0	9.69747	continuous remission
SJBALL021962	No	N/A	B Cell	B other	None	N/A	Standard	14.8	128.1	Male	Black	CNS1	0.411	11.571	0	8.1588	hematological relapse
SJETV021963	Yes	EGAS00001003266	B Cell	ETV6-RUNX1	None	ETV6-RUNX1	Low	3.29	48.3	Male	White	CNS1	0.01	0.099	0	9.86721	continuous remission
SJBALL021964	Yes	EGAS00001003266	B Cell	BCR-ABL1-like	None	IGH-CRLF2	Standard	6.5	38.8	Male	White	CNS1	0.054	4.75	0.008	9.79055	continuous remission
SJTALL022058	Yes	EGAS00001005084	T Cell	TAL1	None	NoFusion	Standard	7.82	42.8	Male	White	CNS3	81.4	25.12	0	9.18275	continuous remission
SJBALL022052	Yes	EGAS00001003266	B Cell	ETV6-RUNX1-like	None	NoFusion	Standard	11.49	111.5	Female	White	CNS1	0.011	0.003	0	9.60438	continuous remission
SJHYPER022033	Yes	EGAS00001005084	B Cell	Hyperdiploidy> 50	None	NoFusion	Low	6.54	5.1	Female	White	CNS1	0.011	0.594	0	9.36893	continuous remission
SJHYPER022034	Yes	EGAS00001003266	B Cell	Hyperdiploidy> 50	None	NoFusion	Low	3.06	1.9	Female	White	CNS1	0.032	0.058	0	9.80972	continuous remission
SJBALL022035	Yes	EGAS00001003266	B Cell	ETV6-RUNX1-like	None	NoFusion	Standard	2.92	98.4	Female	White	CNS1	0.032	0.298	0	9.33881	continuous remission
SJHYPER021965	Yes	EGAS00001005084	B Cell	Hyperdiploidy> 50	None	NoFusion	Standard	17.92	1.6	Male	White	CNS1	0.254	2.96	0	9.54689	continuous remission
SJHYPER021966	Yes	EGAS00001004739	B Cell	Hyperdiploidy> 50	None	P2RY8-CRLF2	Standard	4.72	4.5	Male	White	CNS1	2.56	4.834	0.003	9.65914	continuous remission
SJETV021967	Yes	EGAS00001003266	B Cell	ETV6-RUNX1	None	ETV6-RUNX1	Low	2.56	20.6	Male	White	CNS2	0	0.006	0	9.58522	continuous remission
SJBALL021968	Yes	EGAS00001003266	B Cell	ZNF384-rearranged	None	EP300-ZNF384	Standard	3.22	120.1	Male	White	CNS2	4.4	5.41	0	9.49213	continuous remission
SJHYPER022036	Yes	EGAS00001004739	B Cell	Hyperdiploidy> 50	None	NoFusion	Standard	8.38	3.6	Male	White	CNS3	0.45	2.395	0	9.94114	continuous remission
SJETV021969	Yes	EGAS00001003266	B Cell	ETV6-RUNX1	None	ETV6-RUNX1	Low	9.02	4.48	Male	White	Traumatic with blasts	0	0.002	0	9.60438	continuous remission
SJHYPER021970	Yes	EGAS00001003266	B Cell	Hyperdiploidy> 50	None	NoFusion	Low	3.53	1.3	Male	White	CNS2	0	0.809	0	9.54415	continuous remission
SJBALL022037	No	N/A	B Cell	B other	None	N/A	Standard	11.23	1.3	Female	White	CNS1	0.135	2.714	0	9.40178	continuous remission
SJHYPER022053	Yes	EGAS00001004739	B Cell	Hyperdiploidy> 50	None	NoFusion	Low	3.61	26.1	Female	White	CNS1	0.304	0.403	0	8.87885	continuous remission
SJBALL022038	No	N/A	B Cell	B other	None	N/A	Standard	12.64	3.79	Male	Black	CNS1	0	0	0	9.41273	continuous remission
SJHYPER022039	Yes	EGAS00001005084	B Cell	Hyperdiploidy> 50	None	NoFusion	Low	1.94	44.9	Male	White	CNS2	0.03	0	0	9.52498	continuous remission
SJTALL022059	No	N/A	T Cell	T other	None	N/A	Standard	2.13	331.7	Male	White	CNS2	0.07	0	0	9.31417	hematological relapse
SJTALL022060	Yes	EGAS00001005084	T Cell	TAL1	None	NoFusion	Standard	10.19	129.6	Male	White	CNS2	0.04	0	0	2.141	death in remission
SJBALL255	Yes	EGAS00001000654	B Cell	BCR-ABL1-like	None	PAN3-ZCCHC7	Standard	4.63	27.3	Male	White	CNS1	2.41	5.362	0.105	8.62423	continuous remission
SJTALL022061	Yes	EGAS00001005084	T Cell	TAL1	None	NoFusion	Standard	3.93	431.9	Male	White	CNS1	79	30	0	9.47844	continuous remission
SJBALL021971	No	N/A	B Cell	B other	None	N/A	Standard	18.89	49.6	Male	Other	CNS1	6.62	3.226	0	8.97467	continuous remission
SJETV021972	Yes	EGAS00001003266	B Cell	ETV6-RUNX1	None	ETV6-RUNX1	Low	3.01	10.2	Female	Black	CNS1	0	0	0	8.46817	continuous remission
SJBALL021973	Yes	EGAS00001003266	B Cell	ZNF384-rearranged	None	EP300-ZNF384	Standard	13.19	20.4	Male	White	CNS1	10.08	8.3	0	9.13073	continuous remission
SJHYPER021974	Yes	EGAS00001004739	B Cell	Hyperdiploidy> 50	None	NoFusion	Standard	11.86	1.7	Female	White	CNS1	0.49	0.557	0.007	8.846	continuous remission
SJETV021975	No	N/A	B Cell	ETV6-RUNX1	None	N/A	Low	3.85	4.45	Male	White	CNS1	0	0	0	9.34155	continuous remission
SJTALL022062	Yes	EGAS00001005084	T Cell	TLX1	None	NoFusion	Standard	4.86	61.4	Male	White	CNS1	36.7	0.045	0	9.13347	continuous remission
SJHYPER021976	Yes	EGAS00001004739	B Cell	Hyperdiploidy> 50	None	NoFusion	Low	6.26	3.8	Male	White	CNS1	0	0.359	0	8.94182	continuous remission
SJTALL022063	Yes	EGAS00001005084	T Cell	NKX2_1	None	NoFusion	Standard	4.51	11.3	Female	White	CNS2	0	0	0	9.05681	continuous remission
SJETV021977	Yes	EGAS00001003266	B Cell	ETV6-RUNX1	None	ETV6-RUNX1	Low	4.15	6.6	Male	Black	CNS1	0.013	0.046	0	8.97467	continuous remission
SJBALL022040	No	N/A	B Cell	B other	None	N/A	Standard	12.32	2.7	Female	White	CNS2	0.01	0.065	0	9.16085	continuous remission
SJBALL021978	No	N/A	B Cell	B other	None	N/A	Standard	11.35	7	Male	White	CNS2	0	0.197	0	8.92539	continuous remission
SJHYPER021979	No	N/A	B Cell	Hyperdiploidy> 50	None	N/A	Low	3.44	4.8	Female	White	CNS1	0.047	0.196	0	8.70637	continuous remission
SJTALL022064	Yes	EGAS00001004739	T Cell	HOXA	None	SET-NUP214	Standard	9.71	8.5	Male	Black	CNS1	15.68	19.1	.	0.85969	death in remission
SJETV022041	Yes	EGAS00001004739	B Cell	ETV6-RUNX1	None	ETV6-RUNX1	Low	3.03	15.4	Female	White	CNS1	0.02	0.145	0	8.58864	continuous remission
SJTALL022065	Yes	EGAS00001005084	T Cell	TAL1	None	NoFusion	Standard	5.6	230.6	Female	White	CNS1	0	0	0	8.98563	continuous remission
SJHYPER022042	Yes	EGAS00001004739	B Cell	Hyperdiploidy> 50	None	NoFusion	Standard	16.79	1.8	Female	White	CNS1	2.34	1.196	0	9.18275	continuous remission
SJTALL022066	Yes	EGAS00001005084	T Cell	NKX2_1	None	NoFusion	Standard	18.02	27.6	Male	White	CNS1	21.15	3.4	0.008	9.08145	continuous remission
SJETV021980	Yes	EGAS00001003266	B Cell	ETV6-RUNX1	None	ETV6-RUNX1	Low	2.86	19.9	Male	Black	CNS2	0	0.85	0	8.35044	continuous remission
SJE2A067	Yes	EGAS00001003266	B Cell	TCF3-PBX1	None	TCF3-PBX1	Standard	2.62	141.6	Male	White	CNS2	0.044	.	0	8.59138	continuous remission
SJETV021981	Yes	EGAS00001003266	B Cell	ETV6-RUNX1	None	ETV6-RUNX1	Low	8.1	111.14	Female	Black	CNS2	0.037	0.007	0	8.58316	continuous remission
SJTALL022067	Yes	EGAS00001005084	T Cell	TAL1	None	NoFusion	Standard	13.03	382.9	Male	White	CNS3	18.9	0.359	0	8.9117	continuous remission
SJHYPO021982	Yes	EGAS00001003266	B Cell	PAX5alt	None	NoFusion	Standard	17.72	1.8	Male	Other	CNS1	0.06	1.127	0.012	8.62697	continuous remission
SJINF022043	Yes	EGAS00001003266	B Cell	KMT2A-rearranged	None	KMT2A-MLLT10	High	0.82	32.9	Male	White	CNS1	0.01	13.7	0	8.61602	continuous remission
SJBALL018291	No	N/A	B Cell	KMT2A-rearranged	None	N/A	Standard	1.48	38.6	Female	Black	CNS3	0.14	0.124	0.004	9.05955	continuous remission
SJBALL018292	Yes	EGAS00001005084	B Cell	PAX5 P80R	None	NoFusion	Low	3.93	44.7	Male	White	CNS2	0.07	0.016	0	8.86242	continuous remission
SJHYPER018293	Yes	EGAS00001005084	B Cell	Hyperdiploidy> 50	None	NoFusion	Low	1.52	168.6	Male	White	CNS1	2.13	0.734	0	8.63792	continuous remission
SJMLL010	Yes	EGAS00001003266	B Cell	KMT2A-rearranged	None	KMT2A-AFF1	Standard	15.01	159.8	Male	Black	CNS1	2.1	0.038	0	4.82957	continuous remission
SJALL040042	Yes	EGAS00001005084	B Cell	ETV6-RUNX1	None	ETV6-RUNX1	Standard	3.79	11.5	Male	White	CNS3	.	0.008	0	8.76386	continuous remission
SJALL048313	Yes	EGAS00001004739	B Cell	Hyperdiploidy> 50	None	NoFusion	Low	2.69	6.8	Female	White	CNS1	0.04	0.013	0	8.48186	continuous remission
SJALL040043	Yes	EGAS00001004739	B Cell	ETV6-RUNX1	None	ETV6-RUNX1	Low	2.6	6.3	Female	White	CNS1	0.21	0.153	0	8.28474	continuous remission
SJALL040044	Yes	EGAS00001004739	B Cell	Hyperdiploidy> 50	None	NoFusion	Low	5.26	6.5	Female	White	CNS2	1.4	0.207	0	8.96099	continuous remission
SJETV022424	Yes	EGAS00001005084	B Cell	ETV6-RUNX1	None	ETV6-RUNX1	Low	2.78	17.4	Male	White	CNS2	0.04	0.056	0	8.59138	continuous remission
SJE2A068	Yes	EGAS00001005084	B Cell	TCF3-PBX1	None	TCF3-PBX1	Standard	6.19	40.6	Female	Other	CNS1	0.187	0.245	0	8.4627	continuous remission
SJALL048314	Yes	EGAS00001004739	B Cell	ETV6-RUNX1	None	ETV6-RUNX1	Low	2.51	1.4	Male	White	CNS1	0	0.004	0	8.42984	continuous remission
SJHYPER022425	Yes	EGAS00001005084	B Cell	Hyperdiploidy> 50	None	NoFusion	Standard	8.76	32.43	Female	White	CNS2	21.54	6.05	0	8.37782	continuous remission
SJTALL022645	Yes	EGAS00001005084	ETP (Early T-cell Precursor)	HOXA	None	PICALM-MLLT10;MLLT10-SYTL2	High	8.94	29.3	Male	White	CNS2	61	86.8	3.82	4.41889	No response
SJBALL040046	No	N/A	B Cell	B other	None	N/A	Standard	6.32	51.8	Male	White	CNS2	24.113	0.484	0	8.88159	continuous remission
SJALL040048	Yes	EGAS00001004739	B Cell	B other	None	MYB-HBS1L	Standard	12.19	1.9	Male	White	CNS1	2.605	7.4	0.321	8.62149	continuous remission
SJALL048315	Yes	EGAS00001004739	B Cell	Hyperdiploidy> 50	None	NoFusion	Low	13.22	7.2	Female	Black	CNS1	0.579	0.642	0	8.71184	continuous remission
SJALL040049	Yes	EGAS00001005084	B Cell	ETV6-RUNX1	None	ETV6-RUNX1	Low	3.77	20.6	Male	White	CNS1	0	0.289	0	8.44079	continuous remission
SJTALL018294	Yes	EGAS00001005084	ETP (Early T-cell Precursor)	T other	None	NoFusion	High	10.63	13.9	Male	Black	CNS2	5.56	29.3	0	8.67899	continuous remission
SJALL040050	Yes	EGAS00001005084	B Cell	Hyperdiploidy> 50	None	NoFusion	Low	7.96	6.2	Female	White	CNS1	0	0.01	0	8.73648	continuous remission
SJALL048316	No	N/A	T Cell	T other	None	N/A	Standard	4.26	169.7	Female	White	CNS1	0	0	0	8.70637	continuous remission
SJALL048317	No	N/A	B Cell	Hyperdiploidy> 50	None	N/A	Low	3.24	4.8	Female	Other	CNS2	0	0.017	0	8.59959	continuous remission
SJALL003226	Yes	EGAS00001005084	T Cell	LMO1/2	None	STAG2-LMO2	High	1.37	401.4	Male	Black	CNS2	32.02	28.3	7.1	1.21013	No response
SJHYPER018295	Yes	EGAS00001004739	B Cell	Hyperdiploidy> 50	None	NoFusion	Standard	14.68	2	Male	White	CNS1	.	0.025	0	8.76112	continuous remission
SJHYPER018296	Yes	EGAS00001004739	B Cell	Hyperdiploidy> 50	None	IGK-CBWD2	Standard	11.93	4.4	Female	White	CNS1	0.11	4.716	0	0.59411	death in remission
SJHYPER022429	Yes	EGAS00001004739	B Cell	Hyperdiploidy> 50	None	NoFusion	Low	5.01	31.3	Male	White	CNS2	0.13	0	0	8.59959	continuous remission
SJALL048318	Yes	EGAS00001005084	T Cell	HOXA	None	NoFusion	Standard	12.27	89.6	Male	Black	CNS1	.	21.3	0.242	8.19713	continuous remission
SJALL058377	Yes	EGAS00001005084	T Cell	TAL1	None	NoFusion	Standard	12.77	9.6	Male	White	CNS1	0.908	2.093	0	8.69541	continuous remission
SJHYPER018297	Yes	EGAS00001005084	B Cell	Hyperdiploidy> 50	None	NoFusion	Low	5.33	31.4	Male	White	CNS1	0	0.014	0	8.64887	continuous remission
SJE2A069	Yes	EGAS00001005084	B Cell	TCF3-PBX1	None	TCF3-PBX1	Standard	2.86	161	Female	White	CNS2	0.933	0.047	0	8.47912	continuous remission
SJTALL018298	Yes	EGAS00001005084	T Cell	TLX1	None	TCRA-TLX1	Standard	3.11	206.9	Female	White	CNS2	4.8	0.073	0	8.64613	continuous remission
SJBALL018299	Yes	EGAS00001005084	B Cell	iAMP21	None	P2RY8-CRLF2	Standard	3.97	58.2	Male	Other	CNS1	.	0.48	0	8.50924	continuous remission
SJALL040051	Yes	EGAS00001004739	B Cell	ETV6-RUNX1	None	ETV6-RUNX1	Low	4.54	16.2	Female	White	CNS1	.	0	0	8.4052	continuous remission
SJPHALL018300	Yes	EGAS00001005084	B Cell	BCR-ABL1	None	BCR-ABL1	High	6.15	255.2	Female	White	CNS1	15.48	26.687	0	8.55031	hematological relapse
SJALL050516	No	N/A	B Cell	KMT2A-rearranged	None	N/A	High	0.44	52	Female	White	Traumatic with blasts	0	0	0	8.3614	continuous remission
SJALL040052	Yes	EGAS00001004739	B Cell	ETV6-RUNX1	None	ETV6-RUNX1	Low	3.33	6.2	Male	White	CNS1	0.22	0.05	0	7.67693	continuous remission
SJALL048319	No	N/A	B Cell	B other	None	N/A	Standard	7.04	6.47	Male	White	CNS3	0	0.908	0	7.78097	continuous remission
SJHYPER018301	Yes	EGAS00001005084	B Cell	Hyperdiploidy> 50	None	NoFusion	Low	7.04	14.4	Female	White	CNS1	0.48	0.012	0	6.6256	continuous remission
SJALL048320	Yes	EGAS00001004739	B Cell	Hyperdiploidy> 50	None	NoFusion	Low	8.66	6.5	Male	Other	CNS1	0.02	0.342	0	8.32854	continuous remission
SJALL048321	Yes	EGAS00001004739	B Cell	ETV6-RUNX1	None	ETV6-RUNX1	Low	4.37	18.2	Male	White	CNS1	0.03	0.01	0	8.55578	continuous remission
SJALL048322	Yes	EGAS00001004739	B Cell	KMT2A-rearranged	None	KMT2A-MLLT3	Standard	1.37	97.6	Female	White	CNS2	0.06	0.02	0	8.34771	continuous remission
SJBALL018302	Yes	EGAS00001005084	B Cell	B other	None	NUP214-ABL1	High	16.26	57.3	Female	White	CNS1	2.02	23.68	0.218	5.82615	death in remission
SJBALL018303	Yes	EGAS00001005084	B Cell	TCF3-PBX1	None	TCF3-PBX1	Standard	6.18	179	Male	Black	CNS2	3.19	2.16	.	8.45448	continuous remission
SJALL018304	Yes	EGAS00001004739	B Cell	Hyperdiploidy> 50	None	NoFusion	Standard	7.06	2.5	Female	White	CNS1	0.06	15.5	0.004	8.23819	continuous remission
SJBALL018305	Yes	EGAS00001005084	B Cell	MEF2D-rearranged	None	MEF2D-BCL9	Standard	12.39	4.76	Male	Black	CNS1	2.09	2.47	0	2.94593	hematological relapse
SJHYPER018306	Yes	EGAS00001005084	B Cell	Hyperdiploidy> 50	None	TCF3-PBX1	Low	6.52	81.9	Male	White	Traumatic with blasts	0.09	0	0	7.72074	continuous remission
SJETV018307	Yes	EGAS00001005084	B Cell	ETV6-RUNX1	None	ETV6-RUNX1	Low	7.56	6.1	Female	White	CNS1	0.02	0.01	0	8.12047	continuous remission
SJTALL018308	Yes	EGAS00001004739	T Cell	TLX3	None	NoFusion	Standard	13.57	12.3	Male	White	CNS2	.	0.005	0	8.41889	continuous remission
SJALL048323	Yes	EGAS00001005084	B Cell	ETV6-RUNX1	None	ETV6-RUNX1	Low	9.03	38.9	Female	Black	CNS1	0	0	0	8.04654	continuous remission
SJALL047510	Yes	EGAS00001005084	B Cell	Hyperdiploidy> 50	None	NoFusion	Low	6.66	89.1	Male	White	CNS2	0.01	0	0	7.8987	continuous remission
SJALL047511	Yes	EGAS00001005084	B Cell	ETV6-RUNX1	None	ETV6-RUNX1	Low	4.57	4.8	Male	White	CNS2	0.31	0.38	0	7.66598	continuous remission
SJALL048324	Yes	EGAS00001004739	B Cell	B other	None	NoFusion	Standard	15.73	1.6	Female	White	CNS2	0.42	3.445	0.005	7.73717	continuous remission
SJALL018311	Yes	EGAS00001004739	B Cell	B other	None	NoFusion	Low	4.71	9.2	Male	White	CNS1	0	0	0	8.27926	continuous remission
SJALL040053	Yes	EGAS00001003266	B Cell	DUX4-rearranged	None	IGH-DUX4	Low	4.22	5.2	Male	White	CNS1	0.31	0.052	0	8.31211	continuous remission
SJALL062147	Yes	EGAS00001005084	B Cell	B other	None	NoFusion	Low	7.48	4.2	Female	White	CNS1	.	0.015	0	7.49076	continuous remission
SJALL040054	Yes	EGAS00001003266	B Cell	PAX5alt	None	PAX5-FOXP1	Standard	15.87	1.4	Female	Black	CNS2	0.04	0.017	0	8.13142	continuous remission
SJALL047512	Yes	EGAS00001005084	B Cell	B other	None	P2RY8-CRLF2	Low	2.68	17.2	Female	White	CNS2	0.01	0.011	0	8.09309	continuous remission
SJALL040055	Yes	EGAS00001003266	B Cell	TCF3-PBX1	None	TCF3-PBX1	Standard	2.57	56.9	Female	Other	CNS2	0.06	0.011	0	8.18891	continuous remission
SJALL040056	Yes	EGAS00001005084	T Cell	TLX3	None	NoFusion	Standard	13.66	638	Male	White	CNS1	.	6.381	0	8.36687	continuous remission
SJALL040057	Yes	EGAS00001003266	B Cell	ETV6-RUNX1	None	ETV6-RUNX1	Standard	10.7	9.6	Female	White	CNS1	0.05	1.235	0	7.98357	continuous remission
SJALL048661	No	N/A	B Cell	Hyperdiploidy> 50	None	N/A	Low	4.21	2.6	Female	White	CNS1	0.01	0	0	7.85489	continuous remission
SJTALL015715	Yes	EGAS00001005084	ETP (Early T-cell Precursor)	T other	None	EIF4G1-ECE2	High	7.98	30.7	Male	White	CNS2	2.4	70.7	0	7.96441	continuous remission
SJALL040058	Yes	EGAS00001003266	B Cell	ZNF384-rearranged	None	TAF15-ZNF384	Standard	12.21	1.8	Male	White	CNS1	0.02	1.3	0	7.56194	continuous remission
SJALL047513	Yes	EGAS00001005084	B Cell	Hyperdiploidy> 50	None	NoFusion	Standard	16.49	1.6	Male	White	CNS1	0	1.1	0.015	7.51814	continuous remission
SJALL048325	Yes	EGAS00001005084	B Cell	Hyperdiploidy> 50	None	NoFusion	Standard	7.55	2.1	Male	White	CNS1	0.04	3.125	0	7.75907	continuous remission
SJALL040059	Yes	EGAS00001003266	B Cell	ETV6-RUNX1	None	ETV6-RUNX1	Low	5.54	2.1	Male	White	CNS2	0	0	0	7.40315	continuous remission
SJALL048662	No	N/A	B Cell	Hyperdiploidy> 50	None	N/A	Low	1.25	2.2	Male	White	CNS2	0	0	0	7.72074	continuous remission
SJALL040060	Yes	EGAS00001003266	B Cell	B other	None	NoFusion	Low	2.21	13	Male	White	CNS2	0.01	0.007	0	8.04381	continuous remission
SJALL040061	Yes	EGAS00001003266	B Cell	ETV6-RUNX1	None	ETV6-RUNX1	Low	4.79	15	Male	White	CNS2	0	0.01	0	7.57016	continuous remission
SJALL048326	No	N/A	B Cell	Hyperdiploidy> 50	None	N/A	Low	2.68	6	Male	White	CNS1	0.03	0.005	0	7.98084	continuous remission
SJALL048663	No	N/A	B Cell	Hyperdiploidy> 50	None	N/A	Low	5.48	2.6	Male	Other	CNS1	0.62	0.52	0	7.80835	hematological relapse
SJALL050510	No	N/A	B Cell	B other	None	N/A	Standard	18.6	3.2	Male	White	CNS2	0	0	0	7.70979	continuous remission
SJALL040062	Yes	EGAS00001005084	T Cell	TAL1	None	NoFusion	High	11.39	120.7	Male	White	Traumatic with blasts	70.89	25.72	0	7.5373	continuous remission
SJALL040064	Yes	EGAS00001003266	B Cell	PAX5alt	None	PAX5-CBFA2T3;NLRC5-PSMA4	Standard	1.96	49.9	Female	White	CNS2	0.02	0.05	0.26	7.77276	continuous remission
SJALL040063	Yes	EGAS00001003266	B Cell	ETV6-RUNX1	None	ETV6-RUNX1	Low	3.15	22.9	Female	White	CNS1	0.03	0.04	0.009	7.76728	continuous remission
SJALL040065	Yes	EGAS00001003266	B Cell	BCL2/MYC	None	IGH-BCL2	High	6.2	157	Male	White	CNS1	21.72	26	12.21	7.86585	continuous remission
SJALL040066	Yes	EGAS00001003266	B Cell	TCF3-PBX1	None	TCF3-PBX1	High	14.68	7.1	Male	White	CNS2	1.07	5.68	1.11	0.64339	death in remission
SJALL047514	Yes	EGAS00001005084	B Cell	BCR-ABL1	None	BCR-ABL1	High	13.44	252.6	Female	White	CNS2	.	73.33	0.02	7.70979	continuous remission
SJALL040067	Yes	EGAS00001003266	B Cell	ETV6-RUNX1	None	ETV6-RUNX1	Low	3.98	13	Male	White	CNS1	0	0	0	3.72074	continuous remission
SJALL048327	No	N/A	B Cell	B other	None	N/A	Low	5.61	1.3	Male	White	CNS2	0	0	0	7.69884	continuous remission
SJALL040068	Yes	EGAS00001003266	B Cell	ETV6-RUNX1	None	ETV6-RUNX1	Low	1.7	64.5	Male	White	CNS1	0	0.007	0	7.53457	continuous remission
SJALL040069	Yes	EGAS00001003266	B Cell	Hypodiploid <44	None	NoFusion	Standard	7.4	8.5	Female	White	CNS1	0.11	9.1	0.01	6.67762	continuous remission
SJALL040070	Yes	EGAS00001003266	B Cell	TCF3-PBX1	None	TCF3-PBX1	Standard	5.08	33.8	Male	White	CNS1	0.09	0	0	7.67146	continuous remission
SJALL048328	Yes	EGAS00001004739	T Cell	TLX3	None	TLX3 intergenic fusion	Standard	8.11	808	Female	Other	CNS2	2.4	0.17	0	7.54278	continuous remission
SJALL048329	Yes	EGAS00001004739	B Cell	B other	None	NoFusion	Low	4.66	9.6	Female	White	CNS1	0	0	0	7.07461	continuous remission
SJALL040071	Yes	EGAS00001005084	T Cell	TLX3	None	NoFusion	Standard	12.93	42.4	Male	White	CNS1	57.2	27.65	0	7.13758	continuous remission
SJALL040073	Yes	EGAS00001003266	B Cell	Hyperdiploidy> 50	None	NoFusion	Low	16.46	1.9	Female	White	CNS1	0	.	0	7.66051	continuous remission
SJALL040072	Yes	EGAS00001003266	B Cell	PAX5alt	None	NoFusion	Standard	17.42	1	Female	White	CNS2	3.38	19.1	0.01	7.52635	continuous remission
SJALL040074	Yes	EGAS00001003266	B Cell	BCR-ABL1	None	BCR-ABL1	High	15.99	2.5	Male	White	CNS1	0.93	15.94	0.009	6.6694	continuous remission
SJALL048330	Yes	EGAS00001005084	T Cell	LMO1/2	None	TCRA-LMO2	Standard	6.35	81.5	Male	White	CNS1	9.72	0.82	0	7.55921	continuous remission
SJALL040075	Yes	EGAS00001005084	T Cell	T other	None	NoFusion	High	15.14	296.6	Female	Black	CNS1	90.55	78.85	3.83	6.31075	continuous remission
SJALL048331	Yes	EGAS00001004739	B Cell	B other	None	IGH-PPP1R2P9	Standard	10.75	2.7	Female	White	CNS1	0.05	15.08	0	7.52909	2ndMALIG
SJALL040076	Yes	EGAS00001003266	B Cell	PAX5 P80R	None	NoFusion	Low	3.51	25	Male	White	CNS2	0.04	0	0	6.95962	continuous remission
SJALL048332	Yes	EGAS00001004739	B Cell	ETV6-RUNX1	None	ETV6-RUNX1	Low	3.68	1.99	Female	White	CNS1	0	0.01	0	6.76523	continuous remission
SJALL048333	Yes	EGAS00001004739	B Cell	B other	None	NoFusion	Standard	14.75	2	Male	Black	CNS1	0	0	0	6.88022	continuous remission
SJALL040077	Yes	EGAS00001003266	B Cell	ETV6-RUNX1	None	ETV6-RUNX1	Low	2.34	17.5	Female	White	CNS1	0.01	0.003	0	7.13484	continuous remission
SJALL047515	Yes	EGAS00001005084	B Cell	ETV6-RUNX1	None	ETV6-RUNX1	Low	3.17	60.8	Male	Black	Traumatic with blasts	.	0.003	0	6.83915	continuous remission
SJALL040078	Yes	EGAS00001003266	B Cell	Hyperdiploidy> 50	None	NoFusion	Standard	7.98	30.3	Female	Black	CNS1	15.15	3.38	0.018	6.98152	continuous remission
SJALL047516	Yes	EGAS00001005084	B Cell	NUTM1-rearranged	None	ZNF618-NUTM1	Standard	14.94	96.1	Male	White	CNS2	0	0	0	6.81999	continuous remission
SJALL048334	Yes	EGAS00001004739	B Cell	Hyperdiploidy> 50	None	TFG-GPR128	Low	2.14	2.6	Male	White	CNS2	0.02	0.129	0	6.91307	continuous remission
SJALL048335	Yes	EGAS00001004739	B Cell	Hyperdiploidy> 50	None	NoFusion	Low	9.59	2.5	Male	White	CNS1	0.74	0	0	6.84463	continuous remission
SJALL040080	Yes	EGAS00001003266	B Cell	DUX4-rearranged	None	ETV6-DUX4	Low	8.28	7.2	Male	White	CNS1	0.1	0.31	0	7.50719	continuous remission
SJALL048336	Yes	EGAS00001004739	B Cell	Hyperdiploidy> 50	None	NoFusion	Low	2.43	13.1	Male	White	CNS1	0.01	0	0	7.07734	continuous remission
SJALL040081	Yes	EGAS00001003266	B Cell	ETV6-RUNX1	None	ETV6-RUNX1	Low	3.18	66.5	Male	White	CNS1	0	0	0	6.61465	continuous remission
SJALL040082	Yes	EGAS00001003266	B Cell	ETV6-RUNX1	None	ETV6-RUNX1	Low	7.34	7.26	Male	White	CNS2	0	0	0	6.7707	continuous remission
SJALL060465	Yes	EGAS00001005084	T Cell	HOXA	None	BCR-ABL1;HOXA10-TRDC	High	3.19	21	Female	White	CNS2	83.6	63.47	2.14	3.01437	hematological relapse
SJALL048337	Yes	EGAS00001005084	B Cell	KMT2A-rearranged	None	KMT2A-MLLT1	High	0.71	450	Male	White	CNS2	1.36	0.012	0.07	6.47775	continuous remission
SJALL040083	Yes	EGAS00001003266	B Cell	PAX5alt	None	P2RY8-CRLF2	Standard	18.02	13.4	Male	White	CNS1	0.01	0.052	0	7.36208	CNS
SJALL048338	Yes	EGAS00001005084	T Cell	T other	None	KDM6A-JADE3	Standard	1.86	45.5	Male	Black	CNS2	0	0	0	7.09377	continuous remission
SJALL040085	Yes	EGAS00001003266	B Cell	Hyperdiploidy> 50	None	NoFusion	Low	6.52	45.9	Male	White	CNS2	3.22	0.34	0	6.84463	continuous remission
SJALL048339	Yes	EGAS00001004739	B Cell	TCF3-PBX1	None	TCF3-PBX1	Standard	10.62	5.8	Female	Black	CNS1	0	0	0	7.50719	hematological relapse
SJALL040086	Yes	EGAS00001003266	B Cell	ETV6-RUNX1	None	ETV6-RUNX1	Standard	2.59	77.4	Female	White	CNS1	0	0	0	6.60917	continuous remission
SJALL040084	Yes	EGAS00001003266	B Cell	ETV6-RUNX1	None	ETV6-RUNX1	Low	2.32	51.5	Male	White	CNS1	0	0.4	0	6.74333	continuous remission
SJALL050511	No	N/A	B Cell	Hyperdiploidy> 50	None	N/A	Standard	10.91	1.4	Male	White	CNS1	0.01	0.3	0	7.14579	continuous remission
SJALL048340	Yes	EGAS00001005084	T Cell	HOXA	None	KMT2A-MLLT1;PDCD6IP-TASP1;DEXI-TASP1	Standard	14.14	37.6	Male	White	CNS1	14.61	2.5	0.01	6.88296	continuous remission
SJALL050512	No	N/A	B Cell	B other	None	N/A	Standard	6.33	2.8	Male	White	CNS1	2.9	2.15	0	7.36208	continuous remission
SJALL048341	Yes	EGAS00001004739	B Cell	ETV6-RUNX1	None	ETV6-RUNX1	Low	3.41	2.4	Female	White	CNS1	0	0.01	0	6.96509	continuous remission
SJALL050513	No	N/A	B Cell	B other	None	N/A	Low	5.08	0.9	Male	White	CNS1	0	0.01	0	7.07187	continuous remission
SJALL048342	Yes	EGAS00001005084	B Cell	B other	None	PAX5-ZNF521;ZCCHC7-DEFB124	Standard	2.97	92.6	Male	White	CNS2	0.83	11.12	0.3	5.91376	TESTES
SJALL040087	Yes	EGAS00001003266	B Cell	Hyperdiploidy> 50	None	NoFusion	Low	2.04	20	Male	White	CNS1	3.56	0.053	0	6.77344	continuous remission
SJALL040088	Yes	EGAS00001003266	B Cell	Hyperdiploidy> 50	None	NoFusion	Low	2.57	29.8	Female	Other	CNS2	0.01	0	0	7.18412	continuous remission
SJALL048343	Yes	EGAS00001005084	B Cell	TCF3-PBX1	None	TCF3-PBX1	Standard	8.18	18.2	Male	White	CNS2	0.25	0.875	0	6.82272	continuous remission
SJALL048344	Yes	EGAS00001004739	B Cell	B other	None	NoFusion	Low	1.72	2.1	Male	White	CNS2	0	0.415	0.008	6.59001	continuous remission
SJALL048345	Yes	EGAS00001005084	ETP (Early T-cell Precursor)	T other	None	NoFusion	High	9.28	2.7	Male	White	CNS1	0.97	0.12	0	6.99247	continuous remission
SJALL048346	Yes	EGAS00001004739	B Cell	B other	None	NoFusion	Low	6.68	4.4	Male	White	CNS1	0	0	0	6.53525	continuous remission
SJALL040089	Yes	EGAS00001005084	T Cell	TLX3	None	NoFusion	Standard	5.71	10.8	Male	White	CNS3	0.11	0.05	0	7.13484	continuous remission
SJALL048347	Yes	EGAS00001004739	B Cell	KMT2A-rearranged	None	KMT2A-AFF1	Standard	9.9	897	Male	White	CNS3	9.1	1.22	0.147	1.44832	hematological relapse
SJALL040090	Yes	EGAS00001003266	B Cell	ETV6-RUNX1	None	ETV6-RUNX1	Low	3.27	26.72	Male	Black	CNS1	0	0	0	7.2115	continuous remission
SJALL040091	Yes	EGAS00001003266	B Cell	PAX5alt	None	PAX5-ETV6	Low	7.52	3.5	Female	White	CNS1	0	0	0	6.88843	continuous remission
SJALL048348	No	N/A	B Cell	B other	None	N/A	Low	3.58	14.37	Male	Black	CNS2	0	0.003	0	6.8501	continuous remission
SJBALL014875	No	N/A	B Cell	Hypodiploid <44	None	N/A	Standard	15.23	4.2	Male	Black	CNS1	0.05	0.04	0	6.38193	continuous remission
SJALL040092	Yes	EGAS00001003266	B Cell	ZNF384-rearranged	None	EP300-ZNF384	Standard	18.45	49.81	Male	White	CNS1	94.39	13.9	0.008	6.61465	continuous remission
SJALL040093	Yes	EGAS00001003266	B Cell	ETV6-RUNX1	None	ETV6-RUNX1	Low	2.91	16.3	Female	Other	CNS2	0	0	0	6.7707	continuous remission
SJALL040094	Yes	EGAS00001005084	T Cell	TAL1	None	NoFusion	Standard	3.16	539.09	Female	White	CNS2	0.36	0.123	0	6.51882	continuous remission
SJALL048349	Yes	EGAS00001004739	B Cell	B other	None	P2RY8-CRLF2	Low	9.79	9.4	Male	Other	CNS2	0.02	0	0	6.3655	continuous remission
SJALL040095	Yes	EGAS00001003266	B Cell	Hyperdiploidy> 50	None	NoFusion	Low	7.72	24	Female	White	Traumatic with blasts	0.14	0	0	6.75428	continuous remission
SJALL040096	Yes	EGAS00001004739	B Cell	Hyperdiploidy> 50	None	NoFusion	Low	2.15	8.7	Male	Other	CNS1	0.26	0.031	0	6.86105	continuous remission
SJALL040097	Yes	EGAS00001005084	T Cell	NKX2_1	None	NoFusion	Standard	5.11	33.77	Female	Black	CNS1	29.03	1.922	0	6.80356	continuous remission
SJALL040098	Yes	EGAS00001005084	T Cell	HOXA	None	DDX3X-MLLT10	Standard	4.27	198.7	Female	White	CNS2	6.3	0.176	0.002	6.68857	continuous remission
SJALL048350	Yes	EGAS00001004739	T Cell	T other	None	NoFusion	Standard	11.93	2.7	Male	Other	CNS2	23.62	8.464	0.004	6.43943	continuous remission
SJALL040099	Yes	EGAS00001003266	B Cell	DUX4-rearranged	None	IGH-DUX4	Standard	9.78	3.7	Male	White	CNS1	44.98	4.113	0	6.7269	continuous remission
SJALL040100	Yes	EGAS00001003266	B Cell	Hyperdiploidy> 50	None	NoFusion	Standard	7.44	28.1	Female	White	CNS3	0.12	0	0	6.76523	continuous remission
SJALL040101	Yes	EGAS00001003266	B Cell	Hyperdiploidy> 50	None	NoFusion	Low	16.92	1.1	Male	White	CNS1	1.56	0.195	0	2.17659	continuous remission
SJALL040102	Yes	EGAS00001003266	B Cell	Hyperdiploidy> 50	None	NoFusion	Low	1.43	5.2	Female	White	CNS1	0.05	0	0	6.65298	continuous remission
SJALL040103	Yes	EGAS00001003266	B Cell	DUX4-rearranged	None	IGH-DUX4;PAX5-ZCCHC7	Standard	14.05	39.5	Female	White	CNS2	5.2	3.81	0	6.71321	continuous remission
SJALL040104	Yes	EGAS00001003266	B Cell	ETV6-RUNX1	None	ETV6-RUNX1	Low	3.55	23.9	Female	Black	CNS1	0	0	0	6.36277	continuous remission
SJALL048351	Yes	EGAS00001005084	B Cell	Hyperdiploidy> 50	None	NoFusion	Standard	2.98	37.2	Male	White	CNS1	1.12	1.129	0	6.55441	continuous remission
SJALL040105	Yes	EGAS00001004739	B Cell	ETV6-RUNX1	None	ETV6-RUNX1	Low	5.62	3.5	Female	White	CNS2	0.02	0.02	0	6.37098	continuous remission
SJALL040106	Yes	EGAS00001003266	B Cell	ETV6-RUNX1	None	ETV6-RUNX1	Low	4.29	7.1	Female	Black	CNS1	0.39	0.107	0	6.23135	continuous remission
SJALL048352	Yes	EGAS00001004739	T Cell	TAL1	None	NoFusion	Standard	14.72	639.6	Male	Black	CNS2	23.59	1.622	0.003	1.1499	continuous remission
SJALL050517	No	N/A	B Cell	Hyperdiploidy> 50	None	N/A	Low	6.9	3.5	Female	White	CNS2	0.63	0.216	0.007	6.6037	continuous remission
SJALL040107	Yes	EGAS00001003266	B Cell	PAX5alt	None	NoFusion	Standard	17.83	63.2	Male	Black	CNS1	0.16	0.611	0	6.40383	hematological relapse
SJALL048353	No	N/A	T Cell	T other	None	N/A	Standard	9.39	9.78	Male	White	CNS3	0.15	0.028	0	6.25599	continuous remission
SJALL040108	Yes	EGAS00001005084	T Cell	TAL1	None	NoFusion	Standard	14.12	52.3	Female	Other	CNS1	1.64	0.02	0	6.49966	2ndMALIG
SJALL048354	No	N/A	B Cell	Hyperdiploidy> 50	None	N/A	Standard	14.89	7.3	Female	Black	CNS1	3.55	2.679	0	6.71047	continuous remission
SJALL040109	Yes	EGAS00001003266	B Cell	PAX5alt	None	NoFusion	Standard	1.76	224.8	Male	White	CNS1	0.28	0.004	0	5.53867	CNS and bilateral ocular relapse
SJALL040110	Yes	EGAS00001003266	B Cell	Hyperdiploidy> 50	None	NoFusion	Standard	10.04	7.5	Male	White	CNS2	0.28	26.808	0.067	5.21834	continuous remission
SJALL040111	Yes	EGAS00001003266	B Cell	ETV6-RUNX1-like	None	ETV6-ELMO1	Low	1.78	26.2	Female	White	CNS1	0.01	0	0	5.57426	continuous remission
SJALL048355	Yes	EGAS00001004739	B Cell	ETV6-RUNX1	None	ETV6-RUNX1	Low	7.26	6.3	Male	White	CNS1	0	0	0	5.78782	continuous remission
SJALL046304	Yes	EGAS00001004739	T Cell	TAL1	None	NoFusion	Standard	12.82	27	Male	White	CNS2	.	0	0	6.29432	continuous remission
SJALL048356	Yes	EGAS00001005084	B Cell	Hyperdiploidy> 50	None	NoFusion	Low	1.69	5.5	Male	White	CNS2	0.02	0.014	0	5.8371	continuous remission
SJALL048357	No	N/A	B Cell	B other	None	N/A	Low	3.24	6.3	Female	White	CNS2	0.28	0.044	0	5.54415	continuous remission
SJALL040112	No	N/A	B Cell	B other	None	N/A	Standard	11.65	15.5	Male	Black	CNS1	0.14	0.618	0	6.36277	continuous remission
SJALL040113	Yes	EGAS00001003266	B Cell	BCR-ABL1-like	None	NoFusion	Standard	15.51	14.3	Male	White	CNS1	0.05	0.658	0	5.62081	continuous remission
SJALL048358	Yes	EGAS00001004739	ETP (Early T-cell Precursor)	T other	None	NoFusion	High	18.74	1.8	Male	Black	CNS2	2.29	0.02	0	5.47844	continuous remission
SJALL048359	No	N/A	T Cell	T other	None	N/A	Standard	10.11	69.6	Male	Black	CNS1	3.16	0.063	0	6.58727	continuous remission
SJALL040114	Yes	EGAS00001003266	B Cell	DUX4-rearranged	None	IGH-DUX4	Standard	6.55	15.6	Female	White	CNS1	8.81	1.27	0	6.41478	continuous remission
SJALL040115	Yes	EGAS00001003266	B Cell	B other	None	NoFusion	Standard	3.71	8	Female	White	CNS1	12.94	4.87	0	5.6783	continuous remission
SJALL048360	Yes	EGAS00001004739	B Cell	BCR-ABL1	None	BCR-ABL1	High	18.01	28.9	Female	White	CNS1	0.14	3	0	5.86995	continuous remission
SJALL040116	Yes	EGAS00001003266	B Cell	Hyperdiploidy> 50	None	NoFusion	Low	3.67	31.9	Female	White	CNS2	2.16	0.21	0	5.73032	continuous remission
SJALL048361	No	N/A	B Cell	Hyperdiploidy> 50	None	N/A	Low	6.09	1.75	Female	White	CNS1	0.03	0.567	0	6.56263	continuous remission
SJALL040117	Yes	EGAS00001003266	B Cell	ETV6-RUNX1	None	ETV6-RUNX1	Low	5.06	52	Female	White	CNS2	.	0.022	0	5.68378	continuous remission
SJALL060466	Yes	EGAS00001005084	B Cell	Hyperdiploidy> 50	None	NoFusion	Standard	14.37	7	Male	White	CNS1	0.01	0.155	0	6.02053	continuous remission
SJALL040118	Yes	EGAS00001003266	B Cell	ETV6-RUNX1	None	ETV6-RUNX1	Standard	2.15	10.4	Male	White	CNS1	0.32	2.664	0.011	6.55989	continuous remission
SJALL040119	Yes	EGAS00001003266	B Cell	KMT2A-rearranged	None	KMT2A-DCPS	Standard	4.02	432.8	Male	White	CNS2	9.39	1.396	0	5.60986	continuous remission
SJBALL014876	Yes	EGAS00001003266	B Cell	Hypodiploid <44	None	NoFusion	Standard	6.65	51	Female	Other	CNS2	0.09	2.28	0	6.24778	death in remission
SJALL062148	Yes	EGAS00001005084	B Cell	KMT2A-rearranged	None	KMT2A-MLLT3	Standard	16.79	52.8	Male	White	CNS2	0	0.081	0	5.51403	continuous remission
SJALL048362	No	N/A	B Cell	Hyperdiploidy> 50	None	N/A	Standard	0.79	11.2	Male	White	CNS3	0.01	0.006	0	5.61807	continuous remission
SJALL048363	Yes	EGAS00001004739	B Cell	B other	None	NoFusion	Standard	15.2	30.8	Male	White	CNS2	0	0	0	6.07803	continuous remission
SJALL048364	Yes	EGAS00001004739	B Cell	B other	None	NoFusion	Standard	16.28	5.76	Male	White	CNS1	0	0	0	5.45927	continuous remission
SJALL048365	Yes	EGAS00001004739	B Cell	ETV6-RUNX1	None	ETV6-RUNX1	Low	9.75	9.3	Female	White	CNS2	0	0	0	6.16564	continuous remission
SJALL048366	Yes	EGAS00001004739	T Cell	T other	None	TCRB-LYL1; BCR-ABL1	Standard	12.86	617	Male	White	CNS1	0.11	0.007	0	6.0616	continuous remission
SJALL040120	Yes	EGAS00001003266	B Cell	DUX4-rearranged	None	IGH-DUX4	Standard	6.27	9.5	Male	Black	CNS1	1.19	14.5	0	5.86721	continuous remission
SJALL048367	Yes	EGAS00001004739	T Cell	T other	None	NoFusion	Standard	17.46	76.4	Female	White	CNS1	7.81	2.246	0	5.77687	continuous remission
SJALL050520	No	N/A	B Cell	Hyperdiploidy> 50	None	N/A	Low	3.02	2.6	Female	Other	CNS1	0	0	0	5.56605	continuous remission
SJALL048368	No	N/A	B Cell	Hyperdiploidy> 50	None	N/A	Low	5.04	1.9	Male	White	CNS2	2.61	0	0	5.57974	continuous remission
SJALL040121	Yes	EGAS00001005084	T Cell	HOXA	None	NUP98-KDM5A	Standard	8.96	11.6	Female	Black	CNS1	.	0	0	5.72758	continuous remission
SJALL048369	No	N/A	B Cell	Hyperdiploidy> 50	None	N/A	Standard	3.39	2.1	Male	White	CNS2	0	0.118	0.038	5.58795	continuous remission
SJALL048370	Yes	EGAS00001005084	ETP (Early T-cell Precursor)	T other	None	SET-NUP214	High	11.87	428	Female	White	CNS2	85.64	.	.	0.03833	death in induction
SJALL040122	Yes	EGAS00001003266	B Cell	DUX4-rearranged	None	IGH-DUX4	Standard	7.82	13.2	Male	White	CNS2	.	14.7	0	5.93292	continuous remission
SJALL040123	Yes	EGAS00001003266	B Cell	ETV6-RUNX1	None	ETV6-RUNX1	Low	7.97	16.6	Female	White	CNS1	0	0	0	6.28337	continuous remission
SJALL040124	Yes	EGAS00001003266	B Cell	Hyperdiploidy> 50	None	NoFusion	Low	3.1	27.1	Female	White	CNS1	0.26	0	0	5.55784	continuous remission
SJALL048371	Yes	EGAS00001004739	T Cell	TAL1	None	STIL-TAL1	Standard	13.36	335.1	Male	White	CNS2	26.14	3.71	0	6.01232	continuous remission
SJALL040125	Yes	EGAS00001003266	B Cell	iAMP21	None	NoFusion	Low	9.18	2.6	Male	White	CNS1	4.12	0.003	0	5.71116	hematological relapse
SJALL040126	Yes	EGAS00001003266	B Cell	Hyperdiploidy> 50	None	NoFusion	Standard	9.61	2.8	Male	Black	CNS2	2.26	1.336	0.003	6.13005	continuous remission
SJALL040127	Yes	EGAS00001003266	B Cell	Hyperdiploidy> 50	None	NoFusion	Low	2.02	12.3	Female	White	CNS1	0.1	0	0	5.58795	continuous remission
SJALL040128	Yes	EGAS00001003266	B Cell	ETV6-RUNX1	None	ETV6-RUNX1	Low	5.02	3.1	Male	White	CNS2	0	0	0	5.58248	continuous remission
SJALL040129	Yes	EGAS00001004739	B Cell	Hyperdiploidy> 50	None	NoFusion	Low	4.24	16.01	Female	White	CNS2	1.94	0.02	0	6.12731	continuous remission
SJALL040130	Yes	EGAS00001003266	B Cell	KMT2A-rearranged	None	KMT2A-MLLT3	Standard	1.86	475.8	Male	White	CNS1	0.45	0.039	0	5.55784	continuous remission
SJALL048372	No	N/A	B Cell	Hyperdiploidy> 50	None	N/A	Low	3.13	3.6	Female	White	CNS1	0.41	0	0	6.05339	continuous remission
SJALL040131	Yes	EGAS00001003266	B Cell	Hyperdiploidy> 50	None	NoFusion	Standard	2.57	100.1	Male	White	CNS3	31.71	0.258	0	5.97947	continuous remission
SJALL048373	Yes	EGAS00001004739	B Cell	ETV6-RUNX1	None	ETV6-RUNX1	Low	16.63	3.1	Male	Black	CNS1	0.01	0	0	3.67967	continuous remission
SJALL040132	Yes	EGAS00001003266	B Cell	ETV6-RUNX1-like	None	P2RY8-CRLF2	Standard	6.76	32.9	Female	White	CNS2	0.53	5.502	0.026	5.84257	continuous remission
SJALL040133	Yes	EGAS00001005084	B Cell	Hyperdiploidy> 50	None	NoFusion	Low	1.34	5.1	Male	White	CNS2	0	0	0	5.70568	continuous remission
SJALL047517	Yes	EGAS00001005084	B Cell	Hyperdiploidy> 50	None	NoFusion	Low	13.94	1.97	Female	White	CNS1	0.45	0.273	0	5.59617	continuous remission
SJALL040135	Yes	EGAS00001003266	B Cell	ETV6-RUNX1	None	ETV6-RUNX1	Low	1.89	22.7	Male	Other	Traumatic with blasts	0.01	0.293	0.006	5.66461	continuous remission
SJALL040136	Yes	EGAS00001003266	B Cell	Hyperdiploidy> 50	None	NoFusion	Low	2.64	18.8	Female	White	CNS2	0.47	0.061	0	5.62081	continuous remission
SJALL040137	Yes	EGAS00001003266	B Cell	ETV6-RUNX1-like	None	IGH-CRLF2	Standard	13.11	92	Female	White	CNS1	0.04	0.6	0.007	5.52772	hematological relapse
SJALL048374	Yes	EGAS00001004739	T Cell	TLX3	None	TLX3 intergenic fusion	Standard	4.62	329.4	Male	White	CNS3	0.19	0.015	0	5.59069	continuous remission
SJALL048375	Yes	EGAS00001004739	B Cell	Hyperdiploidy> 50	None	NoFusion	Low	9.76	6.5	Male	White	CNS1	0.7	0	0	4.95277	continuous remission
SJALL048376	Yes	EGAS00001004739	B Cell	ETV6-RUNX1	None	ETV6-RUNX1	Low	2.44	10.03	Female	White	CNS2	0.06	0.016	0	5.67283	continuous remission
SJALL048377	Yes	EGAS00001005084	B Cell	BCR-ABL1-like	None	NRIP1-NCAM2	Standard	6.69	20.2	Female	White	CNS2	2.08	8.434	0	5.577	continuous remission
SJALL047518	Yes	EGAS00001005084	B Cell	Hypodiploid <44	None	NoFusion	High	11.86	31.8	Female	White	CNS1	0.63	0.051	0	5.24298	continuous remission
SJALL050521	No	N/A	B Cell	KMT2A-rearranged	None	N/A	High	0.52	411.9	Male	White	Traumatic with blasts	0.09	1.274	0	1.6345	death in remission
SJALL047519	Yes	EGAS00001005084	B Cell	ETV6-RUNX1	None	ETV6-RUNX1	Low	4.08	42.97	Female	Black	CNS1	0	0.014	0	5.84531	continuous remission
SJALL047520	Yes	EGAS00001005084	B Cell	PAX5alt	None	PAX5-CBFA2T3	Standard	11.76	10	Female	White	Traumatic with blasts	.	2.656	0.012	5.64819	continuous remission
SJALL047521	Yes	EGAS00001005084	B Cell	ETV6-RUNX1	None	ETV6-RUNX1	Low	6.81	10.7	Male	White	CNS1	0.41	0.007	0	5.80698	continuous remission
SJALL047522	Yes	EGAS00001005084	B Cell	DUX4-rearranged	None	IGH-DUX4	Standard	16.86	350.2	Male	White	CNS1	14.05	13.098	0.022	5.54689	continuous remission
SJALL048378	Yes	EGAS00001005084	T Cell	T other	None	TCRB-UBN2	Standard	14.85	90.42	Male	White	CNS2	0.02	0	0	5.37714	continuous remission
SJALL047523	Yes	EGAS00001005084	B Cell	ETV6-RUNX1	None	ETV6-RUNX1	Low	3.65	18.56	Male	White	CNS2	0.1	0	0	5.58522	continuous remission
SJALL048379	No	N/A	B Cell	B other	None	N/A	Low	2.57	39.3	Female	White	CNS2	0	0	0.007	5.54415	continuous remission
SJALL048380	Yes	EGAS00001004739	T Cell	TAL1	None	NoFusion	Standard	12.32	338	Female	White	CNS2	0	0	0	5.74949	continuous remission
SJALL048381	Yes	EGAS00001004739	B Cell	ETV6-RUNX1	None	ETV6-RUNX1	Low	4.1	5.4	Male	White	CNS1	0.15	0.007	0	2.76523	continuous remission
SJALL048382	Yes	EGAS00001004739	B Cell	Hyperdiploidy> 50	None	NoFusion	Low	5.52	4.6	Male	White	CNS2	0.02	0.039	0	4.63518	continuous remission
SJALL048383	Yes	EGAS00001005084	T Cell	TAL2	None	TCRB-LMO1	Standard	3.66	160.5	Male	Black	CNS2	14.62	1.11	0.015	4.65161	continuous remission
SJALL047524	Yes	EGAS00001005084	B Cell	ETV6-RUNX1	None	ETV6-RUNX1	Low	4.82	3.52	Female	White	CNS1	0	0	0	5.72758	continuous remission
SJALL048384	Yes	EGAS00001004739	B Cell	B other	None	P2RY8-CRLF2	Low	3.07	3.07	Female	White	CNS2	0	0.012	0	4.69815	continuous remission
SJALL047525	Yes	EGAS00001005084	B Cell	NUTM1-rearranged	None	ACIN1-NUTM1	Standard	14.84	22.1	Male	Black	CNS1	0	0	0	4.59685	continuous remission
SJALL047526	Yes	EGAS00001005084	B Cell	ETV6-RUNX1	None	ETV6-RUNX1	Low	3.41	10.6	Female	White	CNS1	0	0	0	5.53046	continuous remission
SJALL047527	Yes	EGAS00001005084	B Cell	ETV6-RUNX1	None	NoFusion	Standard	6.55	41.3	Female	White	CNS1	0.35	0.2	0.073	5.50308	continuous remission
SJALL050522	No	N/A	B Cell	Hyperdiploidy> 50	None	N/A	Low	6.92	5.7	Female	White	CNS1	0	0	0	5.05133	continuous remission
SJALL048664	No	N/A	B Cell	Hyperdiploidy> 50	None	N/A	Standard	2.29	2	Male	White	CNS1	0.11	0.113	0.086	4.54483	continuous remission
SJALL048385	Yes	EGAS00001005084	B Cell	B other	None	PAX5-FBRSL1	Standard	11.52	133.65	Male	White	CNS2	1.38	0	0	4.73648	continuous remission
SJALL048386	Yes	EGAS00001004739	B Cell	Hyperdiploidy> 50	None	NoFusion	Standard	12.47	2.1	Female	White	CNS3	0.02	0.02	0	5.3963	continuous remission
SJALL048387	Yes	EGAS00001004739	B Cell	ETV6-RUNX1	None	ETV6-RUNX1	Low	3.9	2.4	Male	White	CNS1	0	0.007	0	4.60507	continuous remission
SJALL048388	Yes	EGAS00001004739	B Cell	B other	None	NoFusion	Standard	15.79	7.4	Female	Black	CNS1	0	0.008	0	5.36619	continuous remission
SJALL056543	No	N/A	B Cell	Hyperdiploidy> 50	None	N/A	Standard	2.4	8.3	Male	White	CNS2	0.02	5.985	0	4.58316	continuous remission
SJALL048389	Yes	EGAS00001005084	T Cell	HOXA	None	KMT2A-AFF1	Standard	1.6	805.7	Male	White	CNS2	2.34	0.069	0	4.49829	CNS
SJALL048390	Yes	EGAS00001004739	T Cell	HOXA	None	KMT2A-MLLT1	High	15.51	660.9	Male	White	CNS2	.	96.479	74	5.41273	No response
SJALL056544	No	N/A	B Cell	Hyperdiploidy> 50	None	N/A	Low	9.5	1.76	Female	Other	CNS1	0	0.006	0	4.95003	continuous remission
SJALL048391	Yes	EGAS00001004739	T Cell	LMO1/2	None	TCRA-LMO2	Standard	2.01	567	Male	Black	Traumatic with blasts	16.5	2.069	0.442	1.76044	hematological relapse
SJALL048392	Yes	EGAS00001004739	B Cell	Hyperdiploidy> 50	None	NoFusion	Low	5.81	2.8	Male	White	Traumatic with blasts	0.24	0.013	0	4.75017	continuous remission
SJALL047528	Yes	EGAS00001005084	B Cell	BCR-ABL1	None	BCR-ABL1	High	14.61	63.8	Male	White	CNS2	0.8	4.901	0	3.93977	hematological relapse
SJALL047529	Yes	EGAS00001005084	B Cell	ETV6-RUNX1	None	ETV6-RUNX1	Low	5.39	10.16	Female	White	CNS1	0	0	0	5.11704	continuous remission
SJALL061922	Yes	EGAS00001005084	B Cell	BCR-ABL1	None	BCR-ABL1	High	16.08	65.9	Male	White	CNS2	50.73	56.317	0	4.50376	continuous remission
SJALL048393	Yes	EGAS00001005084	B Cell	BCR-ABL1-like	None	IGH-CRLF2	High	9.91	137.85	Male	White	CNS2	31.15	52.348	2.759	4.72005	continuous remission
SJALL048394	Yes	EGAS00001004739	B Cell	Hyperdiploidy> 50	None	NoFusion	Low	2.25	21.4	Male	White	CNS2	0.06	0.018	0	4.38604	continuous remission
SJALL061923	No	N/A	B Cell	ETV6-RUNX1	None	N/A	Low	9.77	8	Female	Black	Traumatic with blasts	0.03	0	0	4.51198	continuous remission
SJALL047530	Yes	EGAS00001005084	B Cell	DUX4-rearranged	None	IGH-DUX4	Low	6.55	30	Male	White	CNS1	1.16	0.043	0	4.58042	continuous remission
SJALL048395	Yes	EGAS00001005084	B Cell	ETV6-RUNX1	None	ETV6-RUNX1	Low	4.92	35.5	Female	White	CNS1	0.01	0.033	0	2.81177	continuous remission
SJALL048396	Yes	EGAS00001004739	T Cell	T other	None	NoFusion	Standard	1.69	30.45	Female	White	CNS1	43.44	21.322	0.126	5.07598	continuous remission
SJALL048397	Yes	EGAS00001004739	B Cell	ETV6-RUNX1	None	ETV6-RUNX1	Low	4.47	29.9	Male	White	CNS1	0.01	0.008	0	4.56947	continuous remission
SJALL048398	Yes	EGAS00001005084	B Cell	Hyperdiploidy> 50	None	NoFusion	Low	9.49	12.3	Male	White	CNS1	0.31	0.005	0	4.62423	continuous remission
SJALL047531	Yes	EGAS00001005084	B Cell	Hyperdiploidy> 50	None	NoFusion	Standard	14.59	8.38	Male	White	CNS2	5.05	26.952	0	4.56947	continuous remission
SJALL048399	Yes	EGAS00001005084	B Cell	Hyperdiploidy> 50	None	NoFusion	Low	4.42	91.5	Male	Black	CNS2	0.01	0	0	4.08761	continuous remission
SJALL048400	Yes	EGAS00001004739	B Cell	BCR-ABL1	None	BCR-ABL1	High	12.85	12.41	Female	White	CNS2	1.19	0.727	0	5.02396	continuous remission
SJALL048401	Yes	EGAS00001004739	T Cell	TLX1	None	NUP214-ABL1	Standard	8.21	19.1	Male	White	CNS1	1.03	0.01	0	5.11704	continuous remission
SJALL048402	Yes	EGAS00001004739	B Cell	KMT2A-rearranged	None	KMT2A-AFF1	Standard	8.63	486	Female	White	CNS1	0.25	2.865	0.003	4.50103	continuous remission
SJALL048403	Yes	EGAS00001005084	B Cell	BCR-ABL1	None	BCR-ABL1	High	11.45	290.9	Male	Black	CNS2	81.89	42.914	0	5.2731	continuous remission
SJALL048404	Yes	EGAS00001005084	B Cell	ETV6-RUNX1	None	ETV6-RUNX1	Low	2.72	17.8	Female	White	CNS1	0	0	0	4.13963	continuous remission
SJALL047532	Yes	EGAS00001005084	B Cell	Hyperdiploidy> 50	None	NoFusion	Standard	4.74	14.56	Male	White	CNS1	4.98	1.4	0	4.92266	continuous remission
SJALL048405	Yes	EGAS00001004739	T Cell	TLX3	None	NUP214-ABL1	High	6.41	15.4	Male	White	CNS2	71	16.3	0.324	4.87611	CNS
SJALL047533	Yes	EGAS00001005084	B Cell	ETV6-RUNX1	None	ETV6-RUNX1	Low	2.84	13.9	Male	Black	Traumatic with blasts	0.11	0.145	0	4.57495	continuous remission
SJALL047534	Yes	EGAS00001005084	B Cell	ETV6-RUNX1	None	ETV6-RUNX1	Low	5.96	19.1	Female	White	CNS1	0.2	0	0	4.59959	continuous remission
SJBALL030572	Yes	EGAS00001005084	B Cell	KMT2A-rearranged	None	KMT2A-MLLT1	Standard	1.07	36.43	Male	Black	CNS2	0.01	0.09	0	4.9473	hematological relapse
SJALL048407	No	N/A	B Cell	Hyperdiploidy> 50	None	N/A	Low	1.64	7.2	Female	White	CNS2	0.07	0	0	5.06776	continuous remission
SJALL048408	Yes	EGAS00001004739	B Cell	ETV6-RUNX1	None	ETV6-RUNX1	Low	7.56	5.41	Female	White	Traumatic with blasts	0	0	0	4.61875	continuous remission
SJALL048409	Yes	EGAS00001004739	B Cell	B other	None	IGH-CEBPA	Standard	11.12	141.1	Female	White	CNS1	0.3	0.002	0	4.61328	continuous remission
SJALL056545	No	N/A	B Cell	KMT2A-rearranged	None	N/A	High	0.56	6.7	Female	Other	CNS2	0.15	0	.	0.08214	death in induction
SJALL048410	No	N/A	B Cell	TCF3-PBX1	None	N/A	Low	8.94	2.11	Male	White	CNS2	0.02	0	0	4.55852	continuous remission
SJALL047535	Yes	EGAS00001005084	B Cell	ETV6-RUNX1	None	ETV6-RUNX1	Standard	6.38	29	Female	White	CNS2	0.9	0.418	0.015	4.89802	continuous remission
SJALL048411	Yes	EGAS00001005084	T Cell	HOXA	None	KMT2A-MLLT1;DEXI-TASP1;PDCD6IP-TASP1	Standard	9.25	14.5	Male	Black	CNS1	2.65	0.065	0	4.64887	continuous remission
SJALL047536	Yes	EGAS00001005084	B Cell	ETV6-RUNX1	None	ETV6-RUNX1	Standard	2.14	39.6	Male	White	CNS1	0.11	1.99	0.042	2.53251	continuous remission
SJALL048412	No	N/A	B Cell	ETV6-RUNX1	None	N/A	Standard	3.47	8.62	Male	White	CNS1	0.07	0.714	0.02	4.53114	continuous remission
SJALL048413	No	N/A	B Cell	Hyperdiploidy> 50	None	N/A	Low	10.48	0.7	Male	White	CNS2	0	0.011	0	4.53388	continuous remission
SJALL061924	Yes	EGAS00001005084	B Cell	Hyperdiploidy> 50	None	NoFusion	Low	9.84	1.8	Male	White	CNS1	0	0.015	0	4.65982	continuous remission
SJALL048414	Yes	EGAS00001004739	T Cell	TLX3	None	TLX3 intergenic fusion	Standard	6.83	431.19	Female	White	CNS1	35.45	0.552	0	4.56947	continuous remission
SJALL048415	Yes	EGAS00001004739	B Cell	B other	None	IGH-CRLF2	Standard	5.76	254.9	Male	White	Traumatic with blasts	2.38	0.426	0	4.58042	continuous remission
SJALL047537	Yes	EGAS00001005084	B Cell	PAX5alt	None	NoFusion	Standard	15.1	196	Male	White	CNS1	2.71	44	0.011	4.57769	continuous remission
SJALL061926	Yes	EGAS00001005084	B Cell	KMT2A-rearranged	None	KMT2A-MLLT10	Standard	1.42	22.8	Male	White	CNS2	0.06	2.448	0	4.57769	continuous remission
SJBALL030034	Yes	EGAS00001005084	B Cell	ETV6-RUNX1	None	ETV6-RUNX1	Low	2.58	15.48	Male	White	CNS1	0	0	0	4.59685	continuous remission
SJALL047538	Yes	EGAS00001005084	B Cell	ETV6-RUNX1	None	ETV6-RUNX1	Low	8.66	22.2	Male	White	CNS1	0.02	0	0	4.16701	continuous remission
SJALL048417	Yes	EGAS00001005084	B Cell	Hyperdiploidy> 50	None	NoFusion	Standard	4.83	3.6	Female	White	CNS2	0.17	1.208	0	4.5859	continuous remission
SJBALL030045	Yes	EGAS00001005084	B Cell	ETV6-RUNX1	None	ETV6-RUNX1	Standard	2.12	36.1	Female	Black	CNS2	0.83	0.325	0.038	4.60233	continuous remission
SJBALL030036	Yes	EGAS00001005084	B Cell	BCR-ABL1-like	None	IGH-CRLF2	Low	9.41	42.7	Male	White	CNS1	0.4	0.08	0	3.12389	CNS
SJBALL030054	Yes	EGAS00001005084	B Cell	BCR-ABL1-like	None	IGH-CRLF2	High	16.85	210.8	Male	White	CNS1	.	72.94	5.775	0.53114	death in remission
SJBALL030042	Yes	EGAS00001005084	B Cell	Hyperdiploidy> 50	None	NoFusion	Low	2.18	20.16	Female	White	CNS2	0.48	0.24	0	4.53662	continuous remission
SJALL048422	No	N/A	B Cell	Hyperdiploidy> 50	None	N/A	Low	5.14	9.7	Female	White	CNS1	0	0	0	4.11773	continuous remission
SJBALL030040	Yes	EGAS00001005084	B Cell	Hyperdiploidy> 50	None	NoFusion	Low	4.87	35.4	Female	Other	CNS1	0.09	0	0	4.05749	continuous remission
SJBALL030052	Yes	EGAS00001005084	B Cell	ETV6-RUNX1-like	None	ETV6-FOXO3;MCTP2-CFAP54;ZFAT-UQCC2	Standard	1.74	8.4	Female	White	CNS2	0.37	2.292	0.172	4.10404	hematological relapse
SJBALL030059	Yes	EGAS00001005084	B Cell	KMT2A-rearranged	None	KMT2A-AFF1	Standard	16.31	36.13	Female	White	CNS1	9.88	0.182	0.016	4.09035	continuous remission
SJALL047539	Yes	EGAS00001005084	B Cell	Hyperdiploidy> 50	None	NoFusion	Low	5.68	8.8	Male	White	CNS1	0.03	0.009	0	4.31211	continuous remission
SJALL048425	No	N/A	B Cell	Hyperdiploidy> 50	None	N/A	Low	16.62	0.78	Female	White	CNS1	0	0	0	4.06297	continuous remission
SJBALL030057	Yes	EGAS00001005084	B Cell	ETV6-RUNX1	None	NoFusion	Low	9.48	1.1	Male	White	CNS2	0.04	0	0	4.04654	continuous remission
SJBALL030048	Yes	EGAS00001005084	B Cell	ETV6-RUNX1	None	ETV6-RUNX1	Low	3.24	5.1	Female	White	CNS2	0.01	0	0	4.16975	continuous remission
SJTALL030064	Yes	EGAS00001005084	T Cell	TAL1	None	STIL-TAL1	Standard	3.66	219.2	Male	White	CNS2	0.28	0	0	3.81383	continuous remission
ALL001	No	N/A	T Cell	T other	None	N/A	Standard	8.92	13.7	Male	White	CNS1	0	0	0	4.39699	continuous remission
SJTALL030071	Yes	EGAS00001005084	T Cell	TLX3	None	NoFusion	Standard	17.71	71.1	Male	White	Traumatic with blasts	0.22	0	0	4.37235	continuous remission
SJALL048429	Yes	EGAS00001004739	B Cell	B other	None	ETV6-RUNX2	Low	5.17	3.2	Male	White	CNS1	0.01	0.23	0	4.36687	continuous remission
SJBALL030072	Yes	EGAS00001005084	B Cell	BCR-ABL1-like	None	P2RY8-CRLF2	Low	8.6	2.7	Female	White	CNS1	0.06	0.14	0	4.48734	continuous remission
SJBALL030095	Yes	EGAS00001005084	B Cell	PAX5alt	None	PAX5-NOL4L	Standard	2.63	12.9	Male	White	CNS3	0	0	0	4.04654	continuous remission
SJALL047540	Yes	EGAS00001005084	B Cell	ETV6-RUNX1	None	ETV6-RUNX1	Low	4.28	24.3	Male	White	CNS2	0.04	0.008	0	3.61123	continuous remission
SJBALL030701	Yes	EGAS00001005084	B Cell	B other	None	NoFusion	Standard	18.54	12.3	Male	Black	CNS3	0.13	33.35	0.564	2.48597	CNS
SJALL047541	Yes	EGAS00001005084	B Cell	KMT2A-rearranged	None	KMT2A-MLLT1	High	0.12	905.3	Female	White	Traumatic with blasts	29.42	2.911	0.011	0.28474	death in remission
SJALL047542	Yes	EGAS00001005084	B Cell	ETV6-RUNX1	None	ETV6-RUNX1	Low	5.62	12.7	Male	White	CNS1	0.01	0	0	3.59206	continuous remission
SJALL061928	Yes	EGAS00001005084	T Cell	HOXA	None	CDK6-EVX1	Standard	14.16	12.5	Female	Black	CNS1	1.5	3.01	0	4.05202	continuous remission
SJALL048431	No	N/A	B Cell	Hyperdiploidy> 50	None	N/A	Standard	4.07	4.1	Male	White	CNS2	0.04	1.165	0	3.59754	continuous remission
SJBALL030091	Yes	EGAS00001005084	B Cell	ETV6-RUNX1	None	ETV6-RUNX1	Low	6.81	7	Female	Black	CNS1	0	0	0	4.17522	continuous remission
SJALL048666	No	N/A	T Cell	T other	None	N/A	High	0.2	95.8	Female	Other	Traumatic with blasts	47.28	31.73	0.034	1.26215	death in remission
SJBALL030090	Yes	EGAS00001005084	B Cell	Hyperdiploidy> 50	None	NoFusion	Low	6.19	41.3	Male	White	CNS1	0.11	0.303	0	4.01916	continuous remission
SJALL047543	Yes	EGAS00001005084	B Cell	MEF2D-rearranged	None	MEF2D-BCL9	Standard	12.37	7.86	Female	White	CNS2	0.01	0	0	3.93155	continuous remission
SJBALL030108	Yes	EGAS00001005084	B Cell	BCR-ABL1	None	BCR-ABL1	High	8.47	4.32	Male	White	CNS1	2.86	31.171	0	0.77207	death in remission
SJBALL030133	Yes	EGAS00001005084	B Cell	KMT2A-rearranged	None	KMT2A-AFF1	High	0.18	125.28	Male	White	CNS2	0	2.88	0	4.08487	hematological relapse
SJBALL030104	Yes	EGAS00001005084	B Cell	B other	None	P2RY8-CRLF2	Low	2.52	10.8	Male	Black	CNS2	0.01	0.023	0	4.08487	continuous remission
SJALL047544	Yes	EGAS00001005084	B Cell	Hypodiploid <44	None	NoFusion	Low	13.79	12.4	Female	White	CNS1	0.02	0.037	0	4.05476	continuous remission
SJALL048437	No	N/A	B Cell	Hyperdiploidy> 50	None	N/A	Low	17.54	3	Male	Black	CNS1	0	0.173	0	4.06297	continuous remission
SJBALL030103	Yes	EGAS00001005084	B Cell	Hyperdiploidy> 50	None	NoFusion	Low	3.89	36.4	Male	White	CNS2	0.67	0.267	0	3.49624	continuous remission
SJBALL030127	Yes	EGAS00001005084	B Cell	DUX4-rearranged	None	IGH-DUX4	Low	8.95	6.7	Female	White	CNS1	2.24	0.264	0	0.50103	death in remission
SJTALL030125	Yes	EGAS00001005084	T Cell	TLX3	None	NoFusion	Standard	10.07	77.8	Male	White	CNS2	0.41	0.013	0	4.06023	continuous remission
SJTALL030124	Yes	EGAS00001005084	T Cell	TAL1	None	NoFusion	Standard	5.6	47.5	Male	White	CNS2	0.36	0.015	0	4.09309	continuous remission
SJTALL030134	Yes	EGAS00001005084	T Cell	LMO1/2	None	LMO2-TRA	Standard	10.32	34.3	Male	White	CNS1	0	0	0	3.99452	continuous remission
SJBALL030130	Yes	EGAS00001005084	B Cell	DUX4-rearranged	None	IGH-DUX4	Standard	1.85	11.2	Male	White	CNS2	3.58	2.888	0	3.62765	continuous remission
SJBALL030132	Yes	EGAS00001005084	B Cell	ETV6-RUNX1	None	ETV6-RUNX1	Low	6.89	6.4	Male	White	CNS2	0.01	0.106	0	3.91239	continuous remission
SJBALL030150	Yes	EGAS00001005084	B Cell	iAMP21	None	NoFusion	Standard	12.53	1.2	Female	White	CNS1	0.03	5.542	0	3.76181	continuous remission
SJBALL030164	Yes	EGAS00001005084	B Cell	ETV6-RUNX1	None	ETV6-RUNX1	Low	2.98	2.8	Female	Black	CNS2	0	0	0	3.59754	continuous remission
SJBALL030145	Yes	EGAS00001005084	B Cell	DUX4-rearranged	None	IGH-DUX4	Low	7.58	6.1	Female	Other	CNS2	0.61	0.172	0	3.91786	continuous remission
SJBALL030190	Yes	EGAS00001005084	B Cell	Hyperdiploidy> 50	None	NoFusion	Low	2.9	77.7	Male	Other	Traumatic with blasts	0	0	0	3.65229	continuous remission
SJBALL030161	Yes	EGAS00001005084	B Cell	Hyperdiploidy> 50	None	NoFusion	Low	3.93	5.04	Male	White	CNS2	0.2	0.071	0	3.75907	continuous remission
SJBALL030170	Yes	EGAS00001005084	B Cell	DUX4-rearranged	None	IGH-DUX4	Low	4.85	4.5	Female	White	CNS2	0.15	0.04	0	3.69884	continuous remission
SJALL048448	Yes	EGAS00001004739	ETP (Early T-cell Precursor)	T other	None	NoFusion	High	9.8	6.14	Female	Other	CNS2	1.36	4.47	0	3.60849	continuous remission
SJTALL030175	Yes	EGAS00001005084	T Cell	TLX3	None	SYNRG-TTBK2	Standard	8.27	367.2	Male	White	CNS2	0	0	0	3.58385	continuous remission
SJTALL030189	Yes	EGAS00001005084	T Cell	HOXA	None	PDCD6IP-TASP1;DEXI-TASP1	Standard	6.77	14.1	Male	Black	CNS1	2.07	2.462	0.047	3.54825	continuous remission
SJBALL030174	Yes	EGAS00001005084	B Cell	ETV6-RUNX1	None	ETV6-RUNX1	Low	9.51	15.38	Male	Other	CNS1	0.06	0	0	3.56468	continuous remission
SJTALL030212	Yes	EGAS00001005084	T Cell	HOXA	None	KMT2A-MLLT10;DEXI-TASP1;PDCD6IP-TASP1	High	2.05	118.79	Female	White	CNS1	28.48	37.204	2.209	3.94798	continuous remission
SJBALL030207	Yes	EGAS00001005084	B Cell	ETV6-RUNX1	None	ETV6-RUNX1	Low	3.16	85.1	Male	White	CNS1	0	0	0	3.99726	continuous remission
SJBALL030258	Yes	EGAS00001005084	B Cell	Hyperdiploidy> 50	None	NoFusion	Standard	6	9.58	Female	White	CNS1	0.22	0.436	0.03	3.60575	continuous remission
SJBALL030215	Yes	EGAS00001005084	B Cell	BCR-ABL1-like	None	PAX5-AUTS2	Standard	12.48	2.5	Male	White	CNS1	2.72	1.619	0.031	3.58111	continuous remission
SJBALL030219	Yes	EGAS00001005084	B Cell	ETV6-RUNX1	None	NoFusion	Low	4.88	4.9	Female	Black	Traumatic with blasts	0	0.007	0	3.58658	continuous remission
SJBALL030225	Yes	EGAS00001005084	B Cell	BCR-ABL1-like	None	NoFusion	Standard	15.34	1.5	Male	White	CNS2	0.01	0.487	0.019	3.61396	continuous remission
SJBALL030221	Yes	EGAS00001005084	B Cell	Hyperdiploidy> 50	None	NoFusion	Low	1.42	3.25	Female	White	CNS1	0	0	0	3.67146	continuous remission
SJTALL030213	Yes	EGAS00001005084	T Cell	LMO1/2	None	NoFusion	Standard	3.39	49	Male	White	CNS2	0.04	0	0	3.62765	continuous remission
SJALL048457	Yes	EGAS00001005084	T Cell	HOXA	None	PICALM-MLLT10	Standard	10.01	184.1	Female	Black	CNS1	0.1	0	0	1.73032	death in remission
SJBALL030216	Yes	EGAS00001005084	B Cell	PAX5alt	None	P2RY8-CRLF2	Standard	2.81	59.6	Male	White	CNS2	0.02	0.046	0.147	3.61944	continuous remission
SJTALL030263	Yes	EGAS00001005084	T Cell	SPI1	None	TCF7-SPI1;WRN-TEX15	High	9.78	86.3	Female	White	CNS2	4.42	2.171	0	1.1499	hematological relapse
SJBALL030248	Yes	EGAS00001005084	B Cell	ETV6-RUNX1	None	ETV6-RUNX1	Low	2.77	5.11	Male	White	CNS1	0.15	0.005	0.002	3.63039	continuous remission
SJBALL030254	Yes	EGAS00001005084	B Cell	BCR-ABL1-like	None	IGH-CRLF2	Low	4.15	3.7	Female	Other	CNS1	0.05	0	0	1.42916	death in remission
SJALL048462	Yes	EGAS00001004739	ETP (Early T-cell Precursor)	T other	None	ETV6-CTNNB1	High	6.13	2.51	Male	White	CNS2	31.05	2.317	0	3.78097	continuous remission
SJBALL030227	Yes	EGAS00001005084	B Cell	ETV6-RUNX1	None	ETV6-RUNX1	Low	6.09	5.9	Female	White	CNS1	0	0.002	0	3.60575	continuous remission
SJALL048464	No	N/A	B Cell	TCF3-PBX1	None	N/A	Standard	11.82	8.5	Male	Black	CNS2	0.08	0	0	3.78645	continuous remission
SJTALL030249	Yes	EGAS00001005084	T Cell	T other	None	SFPQ-ZFP36L2	Standard	12.04	2.8	Male	Black	CNS1	2.06	1.669	0	3.57837	continuous remission
SJBALL030267	Yes	EGAS00001005084	B Cell	Hyperdiploidy> 50	None	NoFusion	Low	3.39	4.7	Female	White	CNS2	0.02	0	0	3.48802	continuous remission
SJBALL030247	Yes	EGAS00001005084	B Cell	ETV6-RUNX1-like	None	IGH-CRLF2	Standard	18.81	56.83	Female	White	CNS1	3.32	1.62	0	3.76181	continuous remission
SJBALL030346	Yes	EGAS00001005084	B Cell	PAX5alt	None	PAX5-DACH1	Low	2.43	4.26	Male	White	CNS1	0	0	0	3.52361	continuous remission
SJBALL030270	Yes	EGAS00001005084	B Cell	Hyperdiploidy> 50	None	NoFusion	Low	6.42	2	Male	White	CNS1	0	0.1	0	3.54552	continuous remission
SJBALL030268	Yes	EGAS00001005084	B Cell	MEF2D-rearranged	None	MEF2D-BCL9	Low	10.12	1.9	Female	White	CNS1	0.34	0.144	0	3.52088	continuous remission
SJBALL030271	Yes	EGAS00001005084	B Cell	Hyperdiploidy> 50	None	NoFusion	Low	4.77	5	Male	White	CNS2	0	0	0	3.26899	continuous remission
SJBALL030282	Yes	EGAS00001005084	B Cell	Hyperdiploidy> 50	None	NoFusion	Low	8	3.5	Male	White	CNS1	0.06	0.24	0	3.52088	continuous remission
SJBALL030275	Yes	EGAS00001005084	B Cell	ETV6-RUNX1	None	ETV6-RUNX1	Low	4.16	10.5	Female	White	CNS1	0.01	0	0	3.29363	continuous remission
SJALL048472	Yes	EGAS00001004739	B Cell	Hyperdiploidy> 50	None	NoFusion	Low	8.33	10.3	Male	White	CNS2	0.23	0	0	2.66393	continuous remission
SJALL048473	Yes	EGAS00001005084	B Cell	Hyperdiploidy> 50	None	NoFusion	Low	2.44	30.1	Male	White	CNS1	1.45	0.135	0	3.68515	continuous remission
SJBALL030266	Yes	EGAS00001005084	B Cell	Hyperdiploidy> 50	None	NoFusion	Low	2.1	6.7	Female	White	CNS2	0	0	0	3.25804	continuous remission
SJBALL030265	Yes	EGAS00001005084	B Cell	Hyperdiploidy> 50	None	NoFusion	Low	4.9	10.89	Male	White	CNS2	0.04	0.018	0	2.94593	continuous remission
SJBALL030295	Yes	EGAS00001005084	B Cell	PAX5alt	None	PAX5-ETV6	Standard	15.09	5.4	Male	White	CNS1	0.54	0.221	0	3.59754	continuous remission
SJBALL030285	Yes	EGAS00001005084	B Cell	Hyperdiploidy> 50	None	NoFusion	Standard	8	310.73	Female	White	CNS2	2.76	0.179	0	3.31554	continuous remission
SJBALL030288	Yes	EGAS00001005084	B Cell	ETV6-RUNX1	None	ETV6-RUNX1	Low	3.86	4.9	Male	Black	CNS1	0	0.022	0	3.54552	continuous remission
SJALL048478	No	N/A	T Cell	T other	None	N/A	Standard	8.4	45.4	Male	Black	CNS1	4.27	0.01	0	3.44148	continuous remission
SJBALL030276	Yes	EGAS00001005084	B Cell	Hyperdiploidy> 50	None	NoFusion	Standard	3.27	4.6	Male	White	CNS1	0.61	1.876	0.286	3.44422	continuous remission
SJBALL030366	Yes	EGAS00001005084	B Cell	ETV6-RUNX1	None	ETV6-RUNX1	Low	3.91	4.6	Female	Other	CNS1	0	0.012	0	3.3128	continuous remission
SJTALL030338	Yes	EGAS00001005084	T Cell	HOXA	None	KMT2A-AFDN;PDCD6IP-TASP1	High	11.64	6.77	Male	Black	CNS2	31.74	17.329	0	0.8898	death in remission
SJALL048482	No	N/A	B Cell	B other	None	N/A	Standard	15.9	43.44	Male	Other	CNS1	.	.	.	0.01643	death in induction
SJBALL030294	Yes	EGAS00001005084	B Cell	PAX5alt	None	NoFusion	Standard	18.09	1.17	Male	Other	CNS1	0.03	0	0	3.26899	continuous remission
SJBALL030290	Yes	EGAS00001005084	B Cell	Hyperdiploidy> 50	None	NoFusion	Standard	4.09	9.5	Male	White	CNS1	3.94	2.083	0	3.50719	continuous remission
SJBALL030311	Yes	EGAS00001005084	B Cell	Hyperdiploidy> 50	None	NoFusion	Low	10	6.8	Female	White	CNS2	7.15	0.013	0	3.10746	continuous remission
SJBALL030325	Yes	EGAS00001005084	B Cell	ETV6-RUNX1	None	ETV6-RUNX1	Low	8.73	8.9	Male	White	CNS1	0.1	0.01	0	3.5373	continuous remission
SJBALL030334	Yes	EGAS00001005084	B Cell	iAMP21	None	NoFusion	Standard	10.97	44.38	Male	White	Traumatic with blasts	7.79	1.491	0	3.47981	continuous remission
SJBALL030318	Yes	EGAS00001005084	B Cell	Hyperdiploidy> 50	None	NoFusion	Standard	5.42	3.27	Male	White	CNS2	0.34	2.143	0	3.30185	continuous remission
SJALL048488	No	N/A	B Cell	Hyperdiploidy> 50	None	N/A	Low	3.3	25.4	Male	White	CNS1	0.03	0	0	3.50171	continuous remission
SJBALL030323	Yes	EGAS00001005084	B Cell	ETV6-RUNX1	None	ETV6-RUNX1	Standard	7.57	10.1	Male	White	CNS2	0.02	0.066	0.014	2.95688	continuous remission
SJBALL030314	No	N/A	B Cell	Hyperdiploidy> 50	None	N/A	Low	2.17	12.5	Male	White	CNS2	0	0	0	2.5681	continuous remission
SJBALL030331	Yes	EGAS00001005084	B Cell	ETV6-RUNX1	None	ETV6-RUNX1	Low	5.67	13.7	Female	White	Traumatic with blasts	0.01	0.005	0	3.31006	continuous remission
SJBALL030337	Yes	EGAS00001005084	B Cell	ETV6-RUNX1	None	ETV6-RUNX1	Low	3.35	11.4	Male	White	CNS1	0.01	0.006	0	3.18412	continuous remission
SJBALL030313	Yes	EGAS00001005084	B Cell	KMT2A-rearranged	None	KMT2A-MLLT1	Standard	2.01	15	Male	Other	CNS1	0	0	0	3.20329	continuous remission
SJALL048490	Yes	EGAS00001004739	B Cell	ETV6-RUNX1	None	ETV6-RUNX1	Low	5	1.68	Male	Other	CNS1	0.02	0.111	0	3.33744	continuous remission
SJALL056554	No	N/A	B Cell	B other	None	N/A	Standard	13.79	0.6	Female	White	CNS1	.	0	0	1.19097	continuous remission
SJALL060471	Yes	EGAS00001005084	B Cell	Hyperdiploidy> 50	None	NoFusion	Low	7.32	4.34	Male	White	CNS1	0.48	0.27	0.004	3.28268	continuous remission
SJALL048491	Yes	EGAS00001004739	B Cell	Hyperdiploidy> 50	None	NoFusion	Low	3.23	16.9	Male	White	CNS1	0	0	0	3.02259	continuous remission
SJALL048492	Yes	EGAS00001005084	B Cell	TCF3-PBX1	None	TCF3-PBX1	Standard	4.09	317.1	Male	White	CNS2	0.85	0.079	0	2.91855	continuous remission
SJALL048493	No	N/A	B Cell	Hyperdiploidy> 50	None	N/A	Low	8.12	3.98	Female	White	CNS1	2.12	0.317	0	3.30459	continuous remission
SJALL048494	Yes	EGAS00001005084	T Cell	TAL1	None	NoFusion	High	14.11	244	Female	White	CNS2	0.02	0	0	2.8282	CNS
SJBALL030344	Yes	EGAS00001005084	B Cell	BCR-ABL1	None	BCR-ABL1	High	5.65	10	Female	White	CNS1	0.18	26.823	0	3.06366	continuous remission
SJALL048496	No	N/A	B Cell	Hyperdiploidy> 50	None	N/A	Low	2.17	6.8	Male	White	CNS2	5.1	0.002	0	3.19781	continuous remission
SJALL048497	No	N/A	B Cell	ETV6-RUNX1	None	N/A	Low	1.78	127.6	Female	White	CNS1	0.1	0.033	0	3.28268	continuous remission
SJALL048498	Yes	EGAS00001004739	B Cell	BCR-ABL1	None	BCR-ABL1	High	14.22	3.3	Male	White	CNS1	1.45	60.7	5.082	2.79535	No response
SJALL060472	Yes	EGAS00001005084	B Cell	ETV6-RUNX1	None	ETV6-RUNX1	Low	4.43	58.1	Male	White	CNS1	0	0	0	2.68583	continuous remission
SJALL056557	No	N/A	B Cell	B other	None	N/A	Low	6.75	1.8	Female	White	CNS1	0	0	0	3.12389	continuous remission
SJALL048667	Yes	EGAS00001005084	B Cell	DUX4-rearranged	None	IGH-DUX4	Standard	11.88	111	Female	White	CNS1	3.91	1.357	0	2.58453	continuous remission
SJALL048668	Yes	EGAS00001004739	B Cell	Hyperdiploidy> 50	None	ETV6-RUNX1	Low	1.84	7.7	Male	White	CNS2	0.75	0.445	0	2.87201	continuous remission
SJBALL030360	Yes	EGAS00001005084	B Cell	Hyperdiploidy> 50	None	NoFusion	Low	3.1	0.9	Female	White	CNS1	0.19	0.092	0	2.91034	continuous remission
SJALL048670	Yes	EGAS00001004739	T Cell	TAL1	None	BCR-ABL1	High	13.31	40.4	Female	White	CNS1	0	0	0	2.6694	continuous remission

## Sheet: Supp Table S2
Supplementary Table S2. Treatment outcome based on leukemia cell subtype and minimal residual disease in blood at day 8 of induction
				5-year EFS, % (95% CI)				5-year OS, % (95% CI)				5-year CRR, % (95% CI)
	Number of patients, %
	MRD <0.01%	MRD 0.01% to<1%	MRD ≥1%	MRD <0.01%	MRD 0.01% to<1%	MRD ≥1%	P-value	MRD <0.01%	MRD 0.01% to<1%	MRD ≥1%	P-value	MRD <0.01%	MRD 0.01% to<1%	MRD ≥1%	P-value
ETV6-RUNX1				98.4	98.3	100		100	98.3	100			1.7
	63 (51.2)	59 (48.0)	1 (0.81)	(94.9-100)	(94.0-100)	(100-100)	0.99	(100-100)	(94.0-100)	(100-100)	0.58	0	(0.0-5.0)	0	0.58
High- hyperdiploid				100	97.4	85.7		100	98.8	100			1.4	10.9
	32 (21.1)	85 (55.9)	35 (23.0)	(100-100)	(93.3-100)	(72.4-99.0)	0.03	(100-100)	(96.1-100)	(100-100)	0.67	0	(0.0-4.2)	(0.0-22.7)	0.04
DUX4-rearranged					100	90.9			100	90.9
	0 (0.00)	7 (38.9)	11 (61.1)	----	(100-100)	(71.9-100)	0.43	----	(100-100)	(71.9-100)	0.43	----	0	0	----
TCF3-PBX1				100	92.9	50		100	92.9	50
	1 (5.9) *	14 (82.4)	2 (11.8)	(100-100)	(78.2-100)	(1.0-99.0)	0.05	(100-100)	(78.2-100)	(1.0-99.0)	0.19	0*	0	0	<.001*
PAX5alt				100	79.4	80		100	100	100			20.6	20
	3 (13.0)	15 (65.2)	5 (21.7)	(100-100)	(57.1-100)	(44.9-100)	0.73	(100-100)	(100-100)	(100-100)	----	0	(0.0-42.2)	(0.0-59.2)	0.73
T Cell				100	81.8	79.6		100	86.4	87.4			9.1	12.9
	9 (10.3)	22 (25.3)	56 (64.4)	(100-100)	(63.6-100)	(68.0-91.2)	0.35	(100-100)	(69.7-100)	(77.6-97.2)	0.52	0	(0.0-21.4)	(3.9-21.9)	0.54
ETP					100	77.8			100	74.1				22.2
	0 (0.00)	1 (10.0)	9 (90.0)	----	(100-100)	(48.4-100)	0.62	----	(100-100)	(43.9-100)	0.56	----	0	(0.0-51.0)	0.62
iAMP21					100				100	100		---
	0 (0.00)	2 (50.0)	2 (50.0)	----	(100-100)	----	0.32	----	(100-100)	(100-100)	----		0	----	0.32
Hypodiploid					100				100			---
	0 (0.00)	6 (100)	0 (0.00)	----	(100-100)	----	----	----	(100-100)	----	---		0	---	---
BCR-ABL1				100	66.7	66.7		100	66.7	83.3			33.3	16.7
	2 (16.7)	4 (33.3)	6 (50.0)	(100-100)	(23.2-100)	(29.1-100)	0.19	(100-100)	(23.2-100)	(50.0-100)	0.73	0	(0.0-98.7)	(0.0-49.3)	0.22
BCR-ABL1-like					75	83.3			87.5	100			12.5
	0 (0.00)	8 (57.1)	6 (42.9)	----	(42.1-100)	(50.0-100)	0.79	----	(60.5-100)	(100-100)	0.92	----	(0.0-37.2)	0	0.4
ETV6-RUNX1-like					62.5				87.5				25
	0 (0.00)	8 (88.9)	1 (11.1)	----	(31.9-93.1)	----	0.48	----	(66.1-100)	---	1	----	(0.0-57.5)	----	0.56
KMT2A-rearranged				53.6	69.2	62.5		85.7	76.9	62.5		32.1	23.1	25
	7 (25.0)	13 (46.4)	8 (28.6)	(17.7-89.5)	(42.5-95.9)	(25.1-99.9)	0.83	(57.3-100)	(51.2-100)	(25.1-99.9)	0.62	(0.0-74.3)	(0.0-47.1)	(0.0-57.7)	0.93
MEF2D-rearranged												---
	0 (0.00)	2 (66.7)	1 (33.3)	----	----	0	0.15	----	----	0	0.15		----	----	0.16
ZNF384-rearranged					100	100			100	100
	0 (0.00)	3 (42.9)	4 (57.1)	----	(100-100)	(100-100)	----	----	(100-100)	(100-100)	----	----	0	0	----
NUTM1-rearranged				100				100
	3 (100)	0 (0.00)	0 (0.00)	(100-100)	----	----	----	(100-100)	----	----	----	0	---	---	----
PAX5 P80R					100				100			---
	0 (0.00)	2 (100)	0 (0.00)	----	(100-100)	----	----	----	(100-100)	----	----		0	---	----
B other				100	75.1	90.9(73.1-		100	95.2	90.9			19.9	9.1
	22 (40.7)	21 (38.9)	11 (20.4)	(100-100)	(55.5-94.7)	100)	0.06	(100-100)	(85.6-100)	(73.1-100)	0.15	0	(1.8-38.0)	(0.0-26.9)	0.1
Total				97.1	89.9	80.8		99.3	95	89.1		1.5	7.1	12.7
	142 (24.8)	272 (47.6)	158 (27.6)	(94.0-100)	(85.6-94.2)	(73.7-87.9)	<.001	(97.7-100)	(91.9-98.1)	(83.4-94.8)	<.001	(0.0-3.6)	(3.9-10.3)	(7.3-18.0)	0.002
Abbreviation: MRD, minimal residual disease; No, number of patients; EFS, event-free survival; OS, overall survival; CCR, cumulative risk of any relapse; CI, confidence interval; ETP, early T-cell precursor ALL.
*This p value reflected one patient with day 8 MRD <0.01% relapsed in bone marrow at 5.7 years

## Sheet: Supp Table S3
Supplementary Table S3. Clinical outcome according to treatment risk-group and leukemia subtypes
Subtype	complete remission			no response	isolated or combined hematological relapse			CNS or testicular relapse			treatment-related death			second cancer
	Low	Standard	High	High	Low	Standard	High	Low	Standard	High	Low	Standard	High	Low	Standard	High
ETV6-RUNX1	109	17	0	0	0	0	0	0	0	0	1	0	0	1	0	0
Hyperdiploidy> 50	101	47	0	0	2	2	0	0	0	0	0	1	0	0	1	0
DUX4-rearranged	7	12	0	0	0	0	0	0	0	0	1	0	0	0	0	0
TCF3-PBX1	1	13	0	0	0	1	0	0	0	0	0	0	2	0	0	0
PAX5alt	4	16	0	0	0	2	0	0	1	0	0	0	0	0	0	0
T Cell	0	70	6	2	0	3	3	0	2	2	0	3	2	0	1	0
ETP	0	0	8	1	0	0	0	0	0	0	0	0	1	0	0	0
BCR-ABL1	0	0	9	1	0	0	2	0	0	0	0	0	1	0	0	0
BCR-ABL1-like	1	9	1	0	0	0	0	1	0	0	1	0	1	0	0	1
ETV6-RUNX1-like	1	5	0	0	0	2	0	0	0	0	0	0	0	1	0	0
KMT2A-rearranged	0	14	4	0	0	4	2	0	0	0	0	0	4	0	0	0
ZNF384-rearranged	0	7	0	0	0	0	0	0	0	0	0	0	0	0	0	0
NUTM1-rearranged	0	3	0	0	0	0	0	0	0	0	0	0	0	0	0	0
PAX5 P80R	2	0	0	0	0	0	0	0	0	0	0	0	0	0	0	0
iAMP21	0	4	0	0	1	0	0	0	0	0	0	0	0	0	0	0
Hypodiploid <44	1	3	1	0	0	0	0	0	0	0	0	1	0	0	0	0
MEF2D-rearranged	1	1	0	0	0	1	0	0	0	0	0	0	0	0	0	0
B other	23	26	2	0	0	2	1	0	2	0	0	2	1	0	1	0

## Sheet: Supp Table S4
Supplementary Table S4. Treatment risk groups, sequential MRD levels, and clinical outcome of molecular subgroups of T-ALL
Subgroup	No.	Standard risk	High risk	Day 8 MRD			Day 15 MRD			Day 46 MRD			Transplant No.	Outcome
				<0.01%	0.01-1%	≥1%	<0.01%	0.01-1%	≥1%	<0.01%	0.01-1%	≥1%		5-year EFS, %(95% CI)	5-year OS,	5-year CCR, %(95% CI)
															%(95% CI)
TLX1	6	6 (100)	0 (0.00)	0 (0.00)	2 (33.3)	4 (66.7)	1 (0.00)	5 (33.3)	0 (66.7)	6 (100)	0 (0.00)	0 (0.00)	0	100(100-100)	100(100-100)	0
NKX2-1	3	3 (100)	0 (0.00)	1 (33.3)	0 (0.00)	2 (66.7)	1 (33.3)	0 (0.00)	2 (66.7)	3 (100)	0 (0.00)	0 (0.00)	0	100(100-100)	100(100-100)	0
TAL2	1	1 (100)	0 (0.00)	0 (0.00)	0 (0.00)	1 (100)	0 (0.00)	0 (0.00)	1 (100)	0 (0.00)	1 (100)	0 (0.00)	0	100(100-100)	100(100-100)	0
TLX3	11	10 (90.9)	1 (9.09)	1 (11.1)	4 (44.4)	4 (44.4)	3 (11.1)	5 (44.4)	3 (44.4)	10 (90.9)	1 (9.09)	0 (0.00)	1	90.9(70.5-100)	100(100-100)	9.1(0.0-26.9)
TAL1	26	23 (88.5)	3 (11.5)	3 (12.0)	8 (32.0)	14 (56.0)	8 (12.0)	8 (32.0)	10 (56.0)	26 (100)	0 (0.00)	0 (0.00)	2	83.6(68.3-98.9)	92.1(80.7-100)	7.7(0.0-18.1)
HOXA	21	14 (66.7)	7 (33.3)	0 (0.00)	1 (5.56)	17 (94.4)	2 (0.00)	4 (5.56)	14 (94.4)	10 (52.6)	4 (21.1)	5 (26.3)	6	60.6(37.1-84.1)	75.2(54.0-96.4)	25.1(5.2-45.1)
LMO1/2	5	4 (80.0)	1 (20.0)	1 (20.0)	1 (20.0)	3 (60.0)	2 (20.0)	1 (20.0)	2 (60.0)	3 (60.0)	1 (20.0)	1 (20.0)	1	60.0(7.5-100)	60.0(7.5-100)	40.0(0.0-89.0)
SPI1	1	0 (0.00)	1 (100)	0 (0.00)	0 (0.00)	1 (100)	0 (0.00)	0 (0.00)	1 (100)	1 (100)	0 (0.00)	0 (0.00)	0	0	0	No Data
T other	30	18 (60.0)	12 (40.0)	3 (10.3)	7 (24.1)	19 (65.5)	6 (10.3)	9 (24.1)	14 (65.5)	23 (79.3)	4 (13.8)	2 (6.90)	7	90.0(78.4-100)	90.0(78.4-100)	6.7(0.0-15.7)
Total	104	79 (75.96)	25 (24.04)	9 (9.28)	23 (23.7)	65 (67.0)	23 (22.6)	32 (31.4)	47 (46.1)	82 (81.19)	11 (10.89)	8 (7.92)	17	81.2(72.8-89.6)	87.2(79.8-94.6)	12.8(6.2-19.3)

## Sheet: Supp Table S5
Supplementary Table S5. Molecular subgroups for T-ALL and ETP subtypes
Molecular subgroup	Immunophenotype
	No Patients
	T-ALL	ETP	Total
HOXA	19	2	21
LMO1/2	5	0	5
NKX2-1	3	0	3
SPI1	1	0	1
TAL1	26	0	26
TAL2	1	0	1
TLX1	6	0	6
TLX3	11	0	11
T other	22	8	30
Total	94	10	104
